# Supplementary material for: Synthesis of 6-Halo-Substituted Pericosine A and an Evaluation of Their Antitumor and Antiglycosidase Activities
Source: MDPI journal article supplement (doi:10.3390/md20070438), 2022-06-30
Supplement: s1 [file s1]

## Synthesis of 6-Halo-substituted Pericosine A and Their Evaluations for Antitumor and Antiglycosidase Activities

Yoshihide Usami<sup>1,\*</sup>, Yoshino Mizobuchi<sup>1</sup>, Mai Ijuin,<sup>1</sup> Takeshi Yamada<sup>2</sup>, Mizuki Morita<sup>1</sup>, Koji Mizuki<sup>1</sup>, Hiroki Yoneyama<sup>1</sup>, and Shinya Harusawa<sup>1</sup>

Osaka University of Pharmaceutical Sciences, Nasahara 4-20-1, Takatsuki, Osaka 569-1094, Japan

### Contents

1. <sup>1</sup>H- and <sup>13</sup>C-NMR spectra of new compounds and pericoxide, and HMBC spectrum of compound **12**

|                                                                                                             |            |
|-------------------------------------------------------------------------------------------------------------|------------|
| Figure S1. <sup>1</sup> H-NMR spectrum of (-)- <b>10<sub>F</sub></b> in CDCl <sub>3</sub> (500MHz)          | page SM- 3 |
| Figure S2. <sup>13</sup> C-NMR spectrum of (-)- <b>10<sub>F</sub></b> in CDCl <sub>3</sub> (125 MHz)        | page SM- 4 |
| Figure S3. <sup>1</sup> H-NMR spectrum of (+)- <b>10<sub>F</sub></b> in CDCl <sub>3</sub> (400 MHz)         | page SM- 5 |
| Figure S4. <sup>13</sup> C-NMR spectrum of (+)- <b>10<sub>F</sub></b> in CDCl <sub>3</sub> (100 MHz)        | page SM- 5 |
| Figure S5. <sup>1</sup> H-NMR spectrum of (-)- <b>1<sub>F</sub></b> in acetone-d <sub>6</sub> (600 MHz)     | page SM- 6 |
| Figure S6. <sup>13</sup> C-NMR spectrum of (-)- <b>1<sub>F</sub></b> in acetone-d <sub>6</sub> (150 MHz)    | page SM- 7 |
| Figure S7. <sup>1</sup> H-NMR spectrum of (+)- <b>1<sub>F</sub></b> in acetone-d <sub>6</sub> (600 MHz)     | page SM- 8 |
| Figure S8. <sup>13</sup> C-NMR spectrum of (+)- <b>1<sub>F</sub></b> in acetone-d <sub>6</sub> (150 MHz)    | page SM- 9 |
| Figure S9. <sup>1</sup> H-NMR spectrum of (-)- <b>10<sub>Br</sub></b> in acetone-d <sub>6</sub> (600 MHz)   | page SM-10 |
| Figure S10. <sup>1</sup> H-NMR spectrum of (-)- <b>10<sub>Br</sub></b> in CDCl <sub>3</sub> (600 MHz)       | page SM-11 |
| Figure S11. <sup>13</sup> C-NMR spectrum of (-)- <b>10<sub>Br</sub></b> in acetone-d <sub>6</sub> (150 MHz) | page SM-12 |
| Figure S12. <sup>1</sup> H-NMR spectrum of (+)- <b>10<sub>Br</sub></b> in acetone-d <sub>6</sub> (600 MHz)  | page SM-13 |
| Figure S13. <sup>13</sup> C-NMR spectrum of (+)- <b>10<sub>Br</sub></b> in acetone-d <sub>6</sub> (150 MHz) | page SM-14 |
| Figure S14. <sup>1</sup> H-NMR spectrum of (-)- <b>1<sub>Br</sub></b> in methanol-d <sub>4</sub> (600 MHz)  | page SM-15 |
| Figure S15. <sup>13</sup> C-NMR spectrum of (-)- <b>1<sub>Br</sub></b> in methanol-d <sub>4</sub> (150 MHz) | page SM-15 |
| Figure S16. <sup>1</sup> H-NMR spectrum of (+)- <b>1<sub>Br</sub></b> in methanol-d <sub>4</sub> (600 MHz)  | page SM-16 |
| Figure S17. <sup>13</sup> C-NMR spectrum of (+)- <b>1<sub>Br</sub></b> in methanol-d <sub>4</sub> (150 MHz) | page SM-16 |
| Figure S18. <sup>1</sup> H-NMR spectrum of (-)- <b>10<sub>I</sub></b> in CDCl <sub>3</sub> (600 MHz)        | page SM-17 |
| Figure S19. <sup>13</sup> C-NMR spectrum of (-)- <b>10<sub>I</sub></b> in CDCl <sub>3</sub> (150 MHz)       | page SM-18 |
| Figure S20. <sup>1</sup> H-NMR spectrum of (+)- <b>10<sub>I</sub></b> in CDCl <sub>3</sub> (400 MHz)        | page SM-19 |
| Figure S21. <sup>13</sup> C-NMR spectrum of (+)- <b>10<sub>I</sub></b> in CDCl <sub>3</sub> (100 MHz)       | page SM-19 |
| Figure S22. <sup>1</sup> H-NMR spectrum of (-)- <b>1<sub>I</sub></b> in acetone-d <sub>6</sub> (600 MHz)    | page SM-20 |
| Figure S23. <sup>13</sup> C-NMR spectrum of (-)- <b>1<sub>I</sub></b> in acetone-d <sub>6</sub> (150 MHz)   | page SM-20 |
| Figure S24. <sup>1</sup> H-NMR spectrum of (+)- <b>1<sub>I</sub></b> in acetone-d <sub>6</sub> (600 MHz)    | page SM-21 |

|                                                                                                            |            |
|------------------------------------------------------------------------------------------------------------|------------|
| Figure S25. $^{13}\text{C}$ -NMR spectrum of (+)- <b>1</b> <sub>I</sub> in acetone- $\text{d}_6$ (150 MHz) | page SM-21 |
| Figure S26. $^1\text{H}$ -NMR spectrum of (-)- <b>11</b> in methanol- $\text{d}_4$ (600 MHz)               | page SM-22 |
| Figure S27. $^{13}\text{C}$ -NMR spectrum of (-)- <b>11</b> in methanol- $\text{d}_4$ (150 MHz)            | page SM-22 |
| Figure S28. $^1\text{H}$ -NMR spectrum of (-)- <b>12</b> in methanol- $\text{d}_4$ (600 MHz)               | page SM-23 |
| Figure S29. $^{13}\text{C}$ -NMR spectrum of (-)- <b>12</b> in methanol- $\text{d}_4$ (150 MHz)            | page SM-23 |
| Figure S30. HMBC spectrum of (-)- <b>12</b> in methanol- $\text{d}_4$ (600 MHz)                            | page SM-23 |
| Figure S31. $^1\text{H}$ -NMR spectrum of (-)- <b>7</b> in methanol- $\text{d}_4$ (600 MHz)                | page SM-24 |
| Figure S32. $^{13}\text{C}$ -NMR spectrum of (-)- <b>7</b> in methanol- $\text{d}_4$ (150 MHz)             | page SM-25 |
| Figure S33. $^1\text{H}$ -NMR spectrum of (+)- <b>7</b> in methanol- $\text{d}_4$ (600 MHz)                | page SM-26 |
| Figure S34. $^{13}\text{C}$ -NMR spectrum of (+)- <b>7</b> in methanol- $\text{d}_4$ (150 MHz)             | page SM-26 |
| 2. Table S1. Deprotection of (-)- <b>10</b> <sub>Br</sub> with Dowex <sup>®</sup> 50WX8-H                  | page SM-27 |

# 1. <sup>1</sup>H- and <sup>13</sup>C-NMR spectra of new compounds and pericopide

Figure S1. <sup>1</sup>H-NMR spectrum of (-)-10<sub>F</sub> in CDCl<sub>3</sub> (500 MHz)

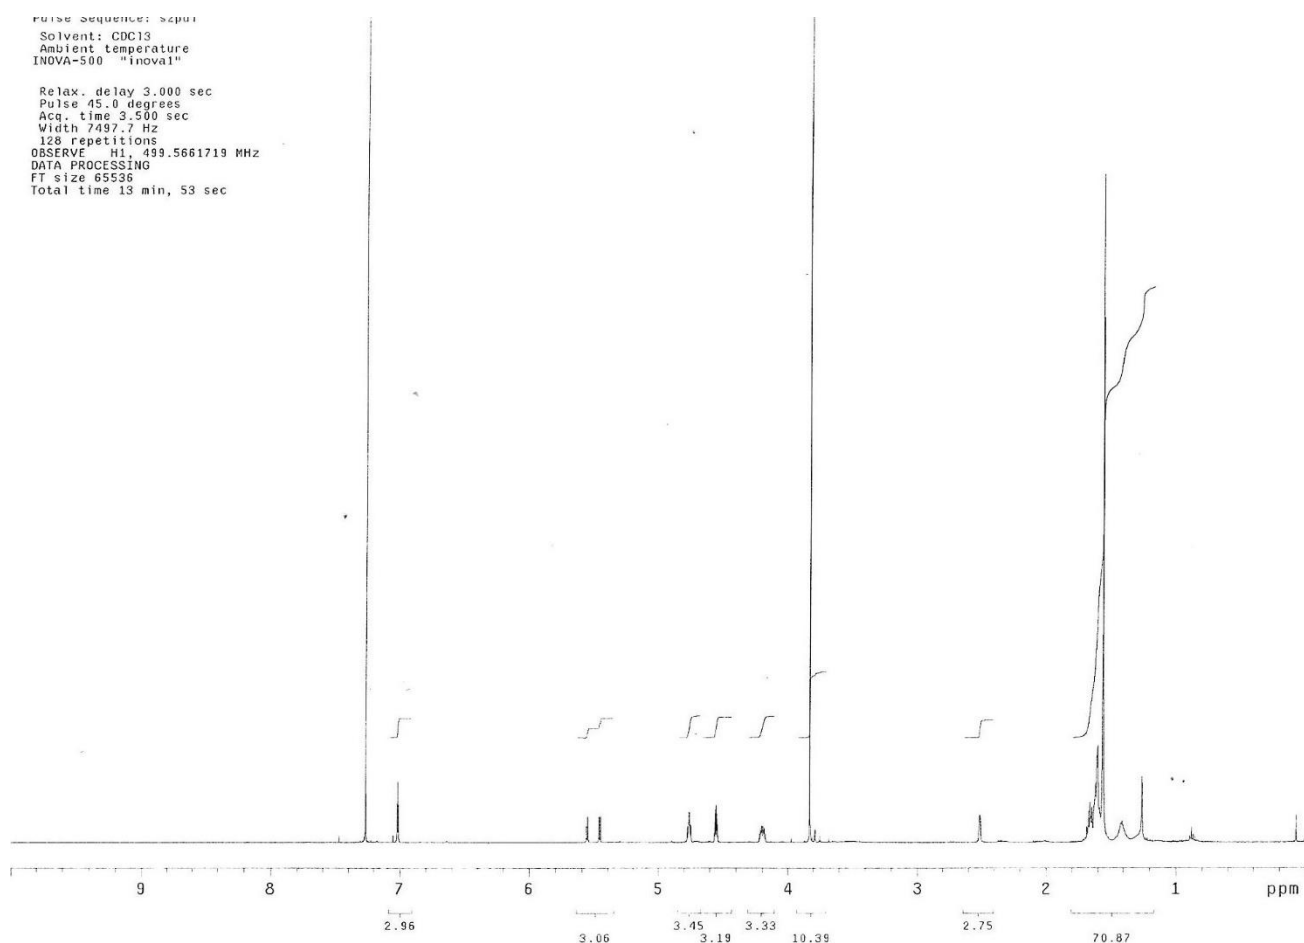

| INDEX | FREQUENCY (PPM) | H <sub>2</sub> | HEIGHT |
|-------|-----------------|----------------|--------|
| 1     | 7.468           | 3730.9811      | 17.9   |
| 2     | 7.302           | 3647.6942      | 6.3    |
| 3     | 7.275           | 3634.4232      | 6.6    |
| 4     | 7.272           | 3633.0503      | 10.3   |
| 5     | 7.271           | 3632.1351      | 15.6   |
| 6     | 7.261           | 3627.5589      | 3492.0 |
| 7     | 7.256           | 3624.8132      | 11.8   |
| 8     | 7.253           | 3623.4403      | 7.1    |
| 9     | 7.222           | 3607.6524      | 6.5    |
| 10    | 7.050           | 3521.8485      | 18.0   |
| 11    | 7.020           | 3506.7470      | 106.0  |
| 12    | 7.014           | 3504.0013      | 166.5  |
| 13    | 7.009           | 3501.2556      | 103.4  |
| 14    | 5.553           | 2779.1302      | 70.1   |
| 15    | 5.551           | 2773.1811      | 71.0   |
| 16    | 5.552           | 2773.4367      | 71.7   |
| 17    | 5.467           | 2731.0800      | 70.4   |
| 18    | 5.456           | 2725.5885      | 72.5   |
| 19    | 5.300           | 2647.7930      | 6.5    |
| 20    | 4.775           | 2385.5764      | 39.9   |
| 21    | 4.773           | 2384.6612      | 41.9   |
| 22    | 4.769           | 2382.3730      | 43.7   |
| 23    | 4.767           | 2381.4576      | 46.4   |
| 24    | 4.762           | 2379.1697      | 84.0   |
| 25    | 4.756           | 2376.1952      | 82.9   |
| 26    | 4.752           | 2375.9071      | 48.9   |
| 27    | 4.750           | 2372.9918      | 45.0   |
| 28    | 4.745           | 2370.7037      | 48.6   |
| 29    | 4.744           | 2369.7885      | 43.6   |
| 30    | 4.560           | 2281.2389      | 54.4   |
| 31    | 4.560           | 2278.0355      | 89.4   |
| 32    | 4.554           | 2275.0610      | 102.7  |
| 33    | 4.548           | 2271.8577      | 79.2   |
| 34    | 4.542           | 2268.8831      | 49.1   |
| 35    | 4.223           | 2109.8599      | 24.5   |
| 36    | 4.218           | 2106.1990      | 39.9   |
| 37    | 4.212           | 2104.3685      | 33.1   |
| 38    | 4.208           | 2102.3092      | 31.7   |
| 39    | 4.205           | 2100.4787      | 45.3   |
| 40    | 4.195           | 2095.6737      | 44.9   |
| 41    | 4.191           | 2093.6432      | 32.3   |
| 42    | 4.187           | 2091.7939      | 32.3   |
| 43    | 4.184           | 2090.1823      | 39.0   |
| 44    | 4.176           | 2086.2925      | 22.9   |
| 45    | 3.973           | 1984.9295      | 11.0   |
| 46    | 3.828           | 1912.3966      | 2278.9 |
| 47    | 3.810           | 1903.4730      | 18.9   |
| 48    | 3.780           | 1893.4054      | 35.2   |
| 49    | 3.783           | 1889.7444      | 36.3   |
| 50    | 3.749           | 1872.8124      | 17.9   |
| 51    | 3.678           | 1837.3468      | 12.4   |
| 52    | 2.517           | 1257.5415      | 70.3   |

Figure S2.  $^{13}\text{C}$ -NMR spectrum of (-)-10<sub>F</sub> in  $\text{CDCl}_3$  (125 MHz)

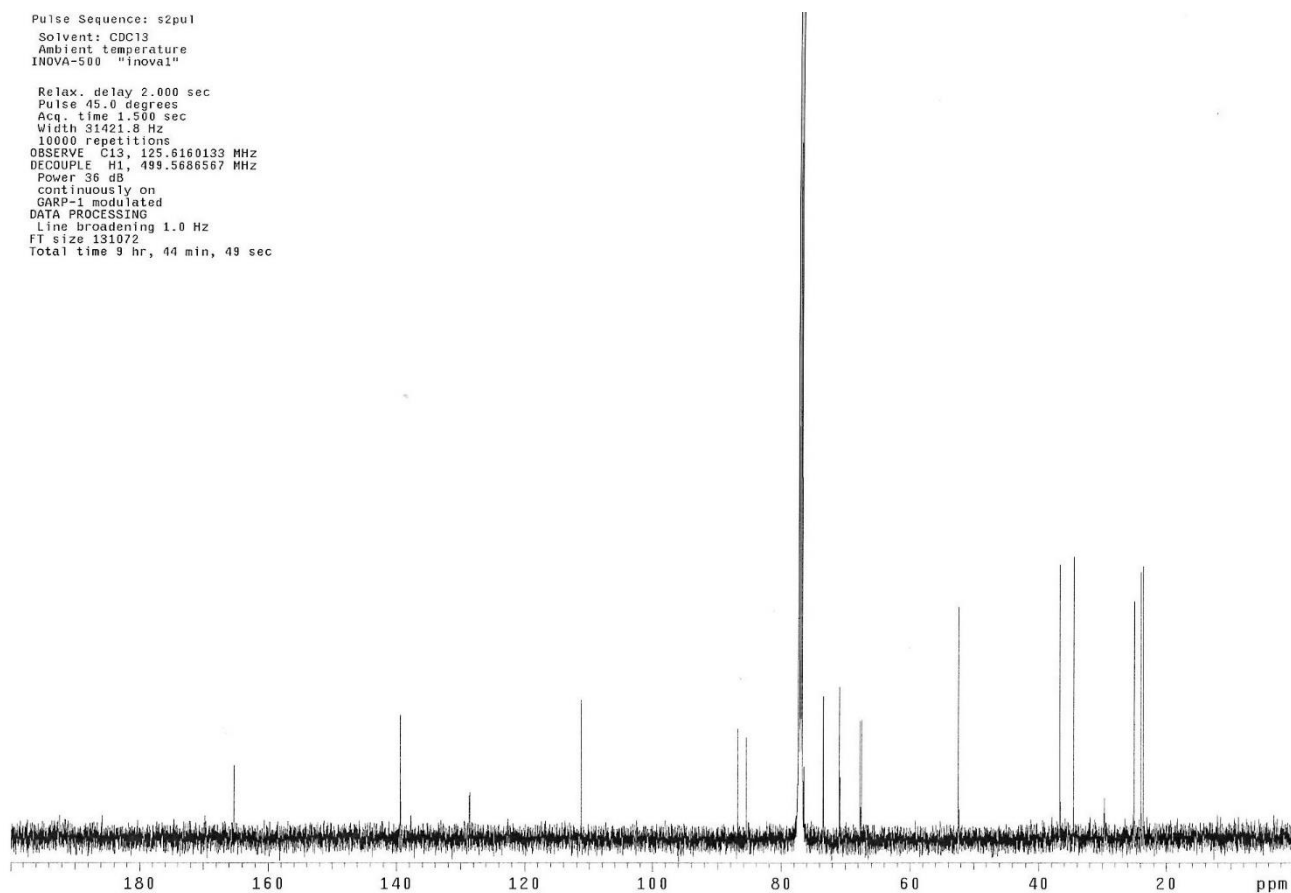

Figure S3. <sup>1</sup>H-NMR spectrum of (+)-10<sub>F</sub> in CDCl<sub>3</sub> (400 MHz)

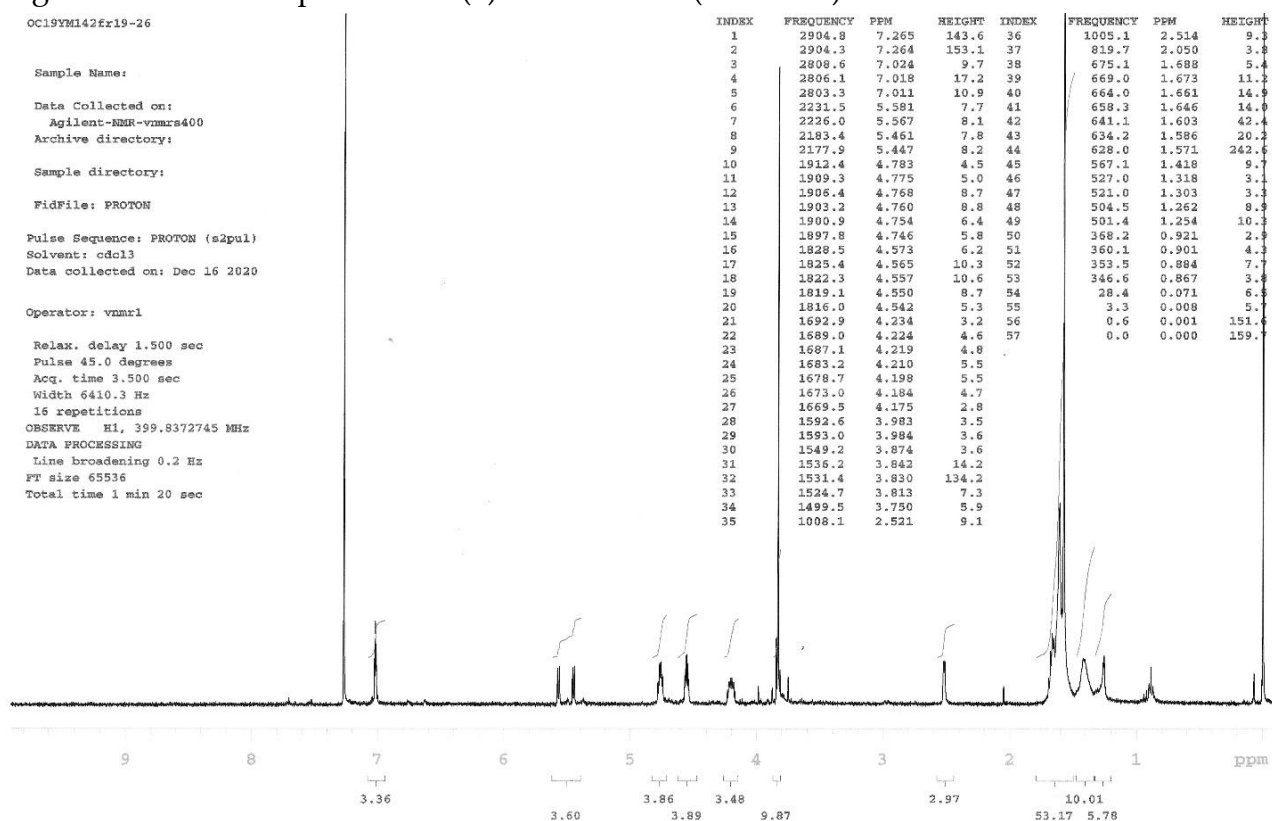

Figure S4. <sup>13</sup>C-NMR spectrum of (+)-10<sub>F</sub> in CDCl<sub>3</sub> (100 MHz)

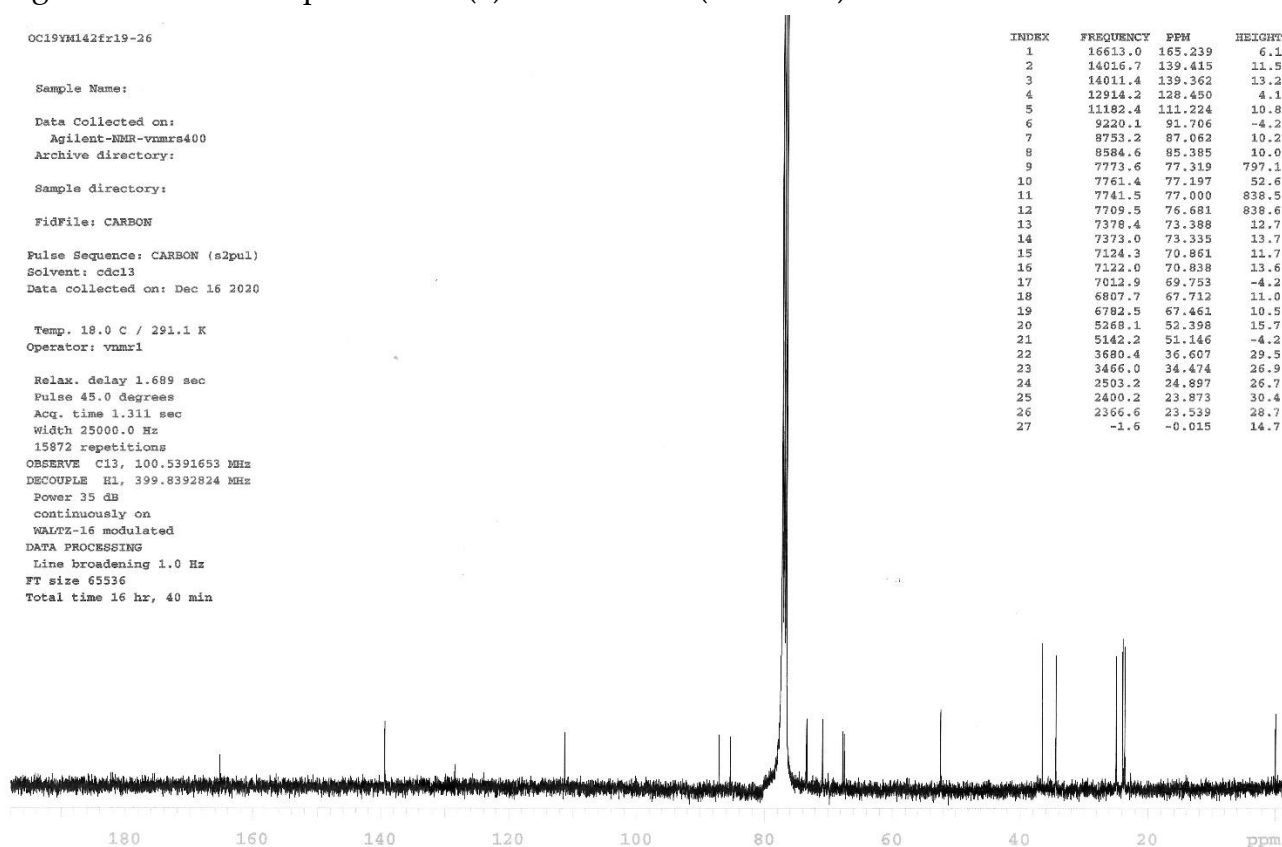

Figure S5. <sup>1</sup>H-NMR spectrum of (-)-1f in acetone-d<sub>6</sub> (600 MHz)

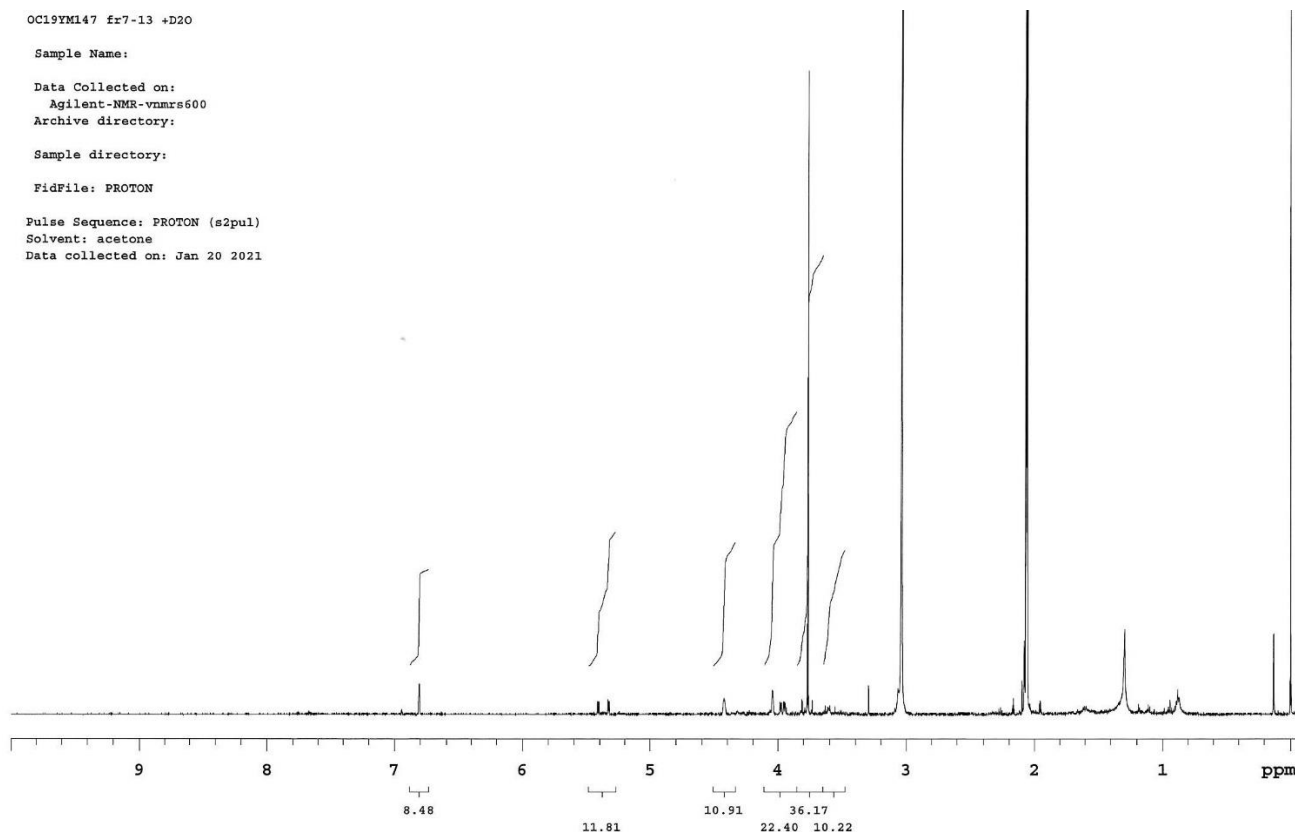

OC19YM147 fr7-13 +D2O

| INDEX | FREQUENCY | PPM   | HEIGHT | INDEX | FREQUENCY | PPM   | HEIGHT | INDEX | FREQUENCY | PPM    | HEIGHT |
|-------|-----------|-------|--------|-------|-----------|-------|--------|-------|-----------|--------|--------|
| 1     | 4166.8    | 6.946 | 7.0    | 51    | 1978.9    | 3.299 | 51.1   | 101   | 775.3     | 1.292  | 146.8  |
| 2     | 4166.2    | 6.945 | 7.2    | 52    | 1853.9    | 3.090 | 8.8    | 102   | 711.9     | 1.187  | 18.3   |
| 3     | 4086.1    | 6.811 | 48.8   | 53    | 1839.6    | 3.066 | 45.4   | 103   | 707.5     | 1.179  | 12.6   |
| 4     | 4085.2    | 6.810 | 53.6   | 54    | 1823.4    | 3.040 | 2108.2 | 104   | 674.9     | 1.125  | 7.3    |
| 5     | 4084.4    | 6.808 | 52.9   | 55    | 1821.7    | 3.037 | 2143.0 | 105   | 666.4     | 1.111  | 18.2   |
| 6     | 4083.5    | 6.807 | 45.3   | 56    | 1807.6    | 3.013 | 17.3   | 106   | 660.2     | 1.101  | 14.7   |
| 7     | 3249.8    | 5.417 | 22.0   | 57    | 1367.7    | 2.280 | 8.0    | 107   | 639.7     | 1.066  | 7.2    |
| 8     | 3249.2    | 5.416 | 23.1   | 58    | 1360.4    | 2.268 | 12.7   | 108   | 592.7     | 0.988  | 9.1    |
| 9     | 3248.1    | 5.414 | 23.1   | 59    | 1353.0    | 2.255 | 7.4    | 109   | 575.7     | 0.960  | 9.2    |
| 10    | 3247.5    | 5.413 | 22.1   | 60    | 1304.3    | 2.174 | 9.9    | 110   | 574.3     | 0.957  | 8.0    |
| 11    | 3243.1    | 5.406 | 22.7   | 61    | 1302.3    | 2.171 | 16.4   | 111   | 572.8     | 0.955  | 13.6   |
| 12    | 3241.9    | 5.404 | 22.3   | 62    | 1299.9    | 2.167 | 28.7   | 112   | 566.9     | 0.945  | 9.2    |
| 13    | 3241.3    | 5.403 | 21.3   | 63    | 1297.9    | 2.163 | 17.0   | 113   | 565.2     | 0.942  | 25.5   |
| 14    | 3200.2    | 5.335 | 26.3   | 64    | 1295.5    | 2.160 | 10.5   | 114   | 557.8     | 0.930  | 12.5   |
| 15    | 3199.7    | 5.334 | 24.7   | 65    | 1270.3    | 2.118 | 8.2    | 115   | 550.2     | 0.917  | 8.5    |
| 16    | 3198.5    | 5.332 | 24.2   | 66    | 1259.7    | 2.100 | 59.0   | 116   | 543.2     | 0.905  | 14.7   |
| 17    | 3194.1    | 5.324 | 23.2   | 67    | 1258.6    | 2.098 | 55.3   | 117   | 535.5     | 0.893  | 23.8   |
| 18    | 3193.5    | 5.323 | 23.2   | 68    | 1258.0    | 2.097 | 51.9   | 118   | 528.2     | 0.880  | 43.7   |
| 19    | 3192.3    | 5.321 | 23.3   | 69    | 1255.9    | 2.094 | 8.1    | 119   | 524.7     | 0.875  | 29.7   |
| 20    | 2656.8    | 4.429 | 26.9   | 70    | 1250.0    | 2.084 | 118.2  | 120   | 521.1     | 0.869  | 28.4   |
| 21    | 2654.7    | 4.425 | 26.6   | 71    | 1248.9    | 2.082 | 58.6   | 121   | 518.5     | 0.864  | 21.1   |
| 22    | 2437.6    | 4.063 | 7.1    | 72    | 1248.0    | 2.080 | 127.5  | 122   | 78.1      | 0.130  | 139.2  |
| 23    | 2434.4    | 4.058 | 7.2    | 73    | 1245.6    | 2.076 | 113.3  | 123   | 76.3      | 0.127  | 21.3   |
| 24    | 2426.4    | 4.045 | 43.5   | 74    | 1242.4    | 2.071 | 1707.9 | 124   | 75.4      | 0.126  | 17.8   |
| 25    | 2425.3    | 4.043 | 37.4   | 75    | 1240.1    | 2.067 | 3063.9 | 125   | 74.2      | 0.124  | 9.4    |
| 26    | 2424.1    | 4.041 | 41.8   | 76    | 1238.0    | 2.064 | 5056.4 | 126   | 58.1      | 0.097  | 7.5    |
| 27    | 2390.9    | 3.986 | 21.8   | 77    | 1235.7    | 2.060 | 3093.8 | 127   | 3.2       | 0.005  | 57.9   |
| 28    | 2388.9    | 3.982 | 19.3   | 78    | 1233.6    | 2.056 | 1683.8 | 128   | 0.0       | 0.000  | 1997.6 |
| 29    | 2384.8    | 3.975 | 21.4   | 79    | 1230.4    | 2.051 | 32.2   | 129   | -3.5      | -0.006 | 53.1   |
| 30    | 2382.7    | 3.972 | 19.8   | 80    | 1224.5    | 2.041 | 18.5   |       |           |        |        |
| 31    | 2374.2    | 3.958 | 22.9   | 81    | 1222.2    | 2.037 | 18.5   |       |           |        |        |
| 32    | 2372.2    | 3.954 | 21.4   | 82    | 1220.1    | 2.034 | 13.4   |       |           |        |        |
| 33    | 2368.0    | 3.947 | 22.2   | 83    | 1217.8    | 2.030 | 10.0   |       |           |        |        |
| 34    | 2366.3    | 3.944 | 20.3   | 84    | 1178.4    | 1.964 | 9.4    |       |           |        |        |
| 35    | 2360.1    | 3.934 | 13.0   | 85    | 1176.1    | 1.960 | 19.9   |       |           |        |        |
| 36    | 2288.5    | 3.815 | 26.0   | 86    | 1173.8    | 1.957 | 24.5   |       |           |        |        |
| 37    | 2285.3    | 3.809 | 23.8   | 87    | 1171.7    | 1.953 | 21.2   |       |           |        |        |
| 38    | 2275.6    | 3.793 | 9.3    | 88    | 1169.4    | 1.949 | 10.1   |       |           |        |        |
| 39    | 2274.4    | 3.791 | 12.9   | 89    | 995.9     | 1.660 | 7.0    |       |           |        |        |
| 40    | 2273.3    | 3.789 | 10.1   | 90    | 968.6     | 1.615 | 11.7   |       |           |        |        |
| 41    | 2265.9    | 3.777 | 23.3   | 91    | 964.2     | 1.607 | 13.0   |       |           |        |        |
| 42    | 2263.9    | 3.774 | 156.4  | 92    | 956.0     | 1.594 | 14.4   |       |           |        |        |
| 43    | 2259.2    | 3.766 | 1102.7 | 93    | 950.4     | 1.584 | 10.2   |       |           |        |        |
| 44    | 2239.5    | 3.733 | 24.9   | 94    | 944.3     | 1.574 | 7.9    |       |           |        |        |
| 45    | 2184.1    | 3.641 | 8.6    | 95    | 930.5     | 1.551 | 7.5    |       |           |        |        |
| 46    | 2179.1    | 3.632 | 16.0   | 96    | 925.2     | 1.542 | 7.4    |       |           |        |        |
| 47    | 2168.5    | 3.615 | 13.7   | 97    | 853.3     | 1.422 | 8.0    |       |           |        |        |
| 48    | 2165.6    | 3.610 | 12.5   | 98    | 846.0     | 1.410 | 8.1    |       |           |        |        |
| 49    | 2158.8    | 3.599 | 15.9   | 99    | 839.5     | 1.399 | 8.5    |       |           |        |        |
| 50    | 2133.6    | 3.557 | 11.6   | 100   | 832.2     | 1.387 | 9.5    |       |           |        |        |

Figure S6.  $^{13}\text{C}$ -NMR spectrum of (-)-**1f** in acetone- $\text{d}_6$  (150 MHz)

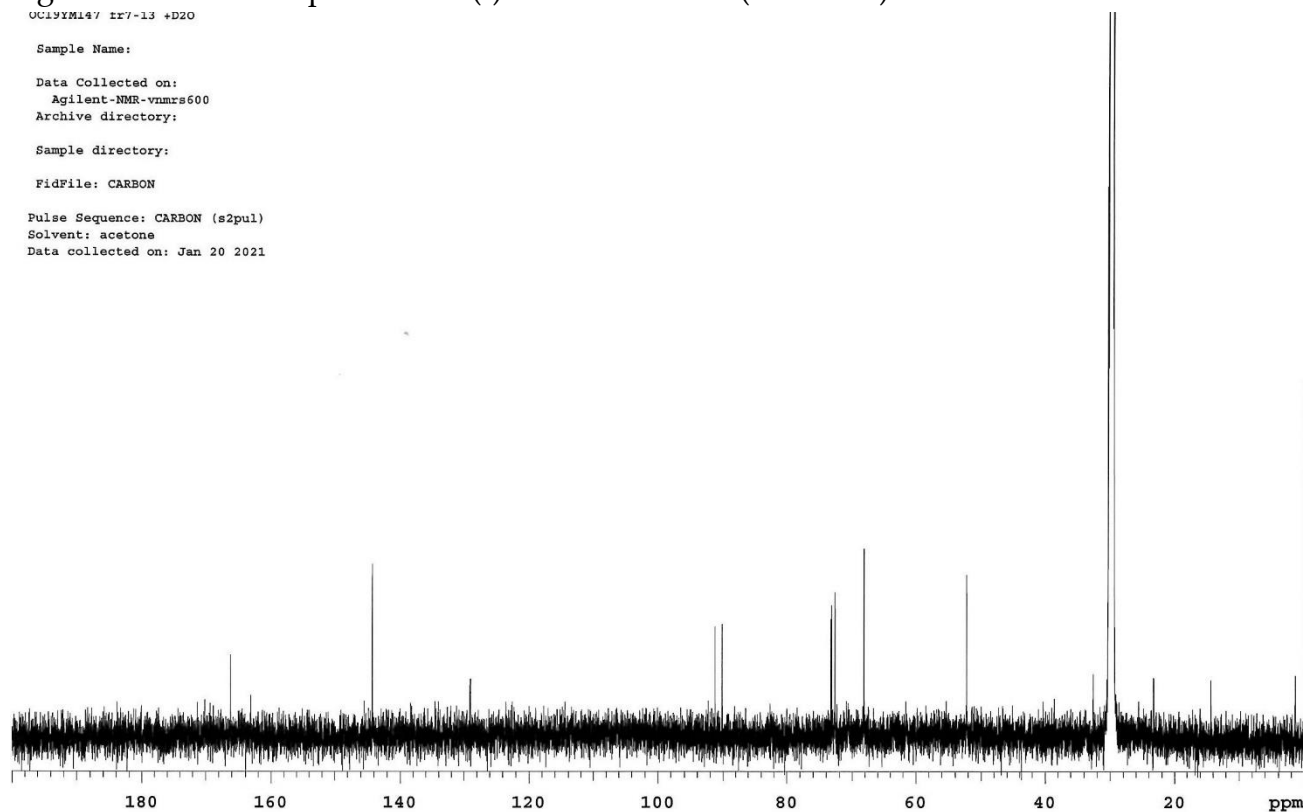

Figure S7. <sup>1</sup>H-NMR spectrum of (+)-1f in acetone-d<sub>6</sub> (600 MHz)

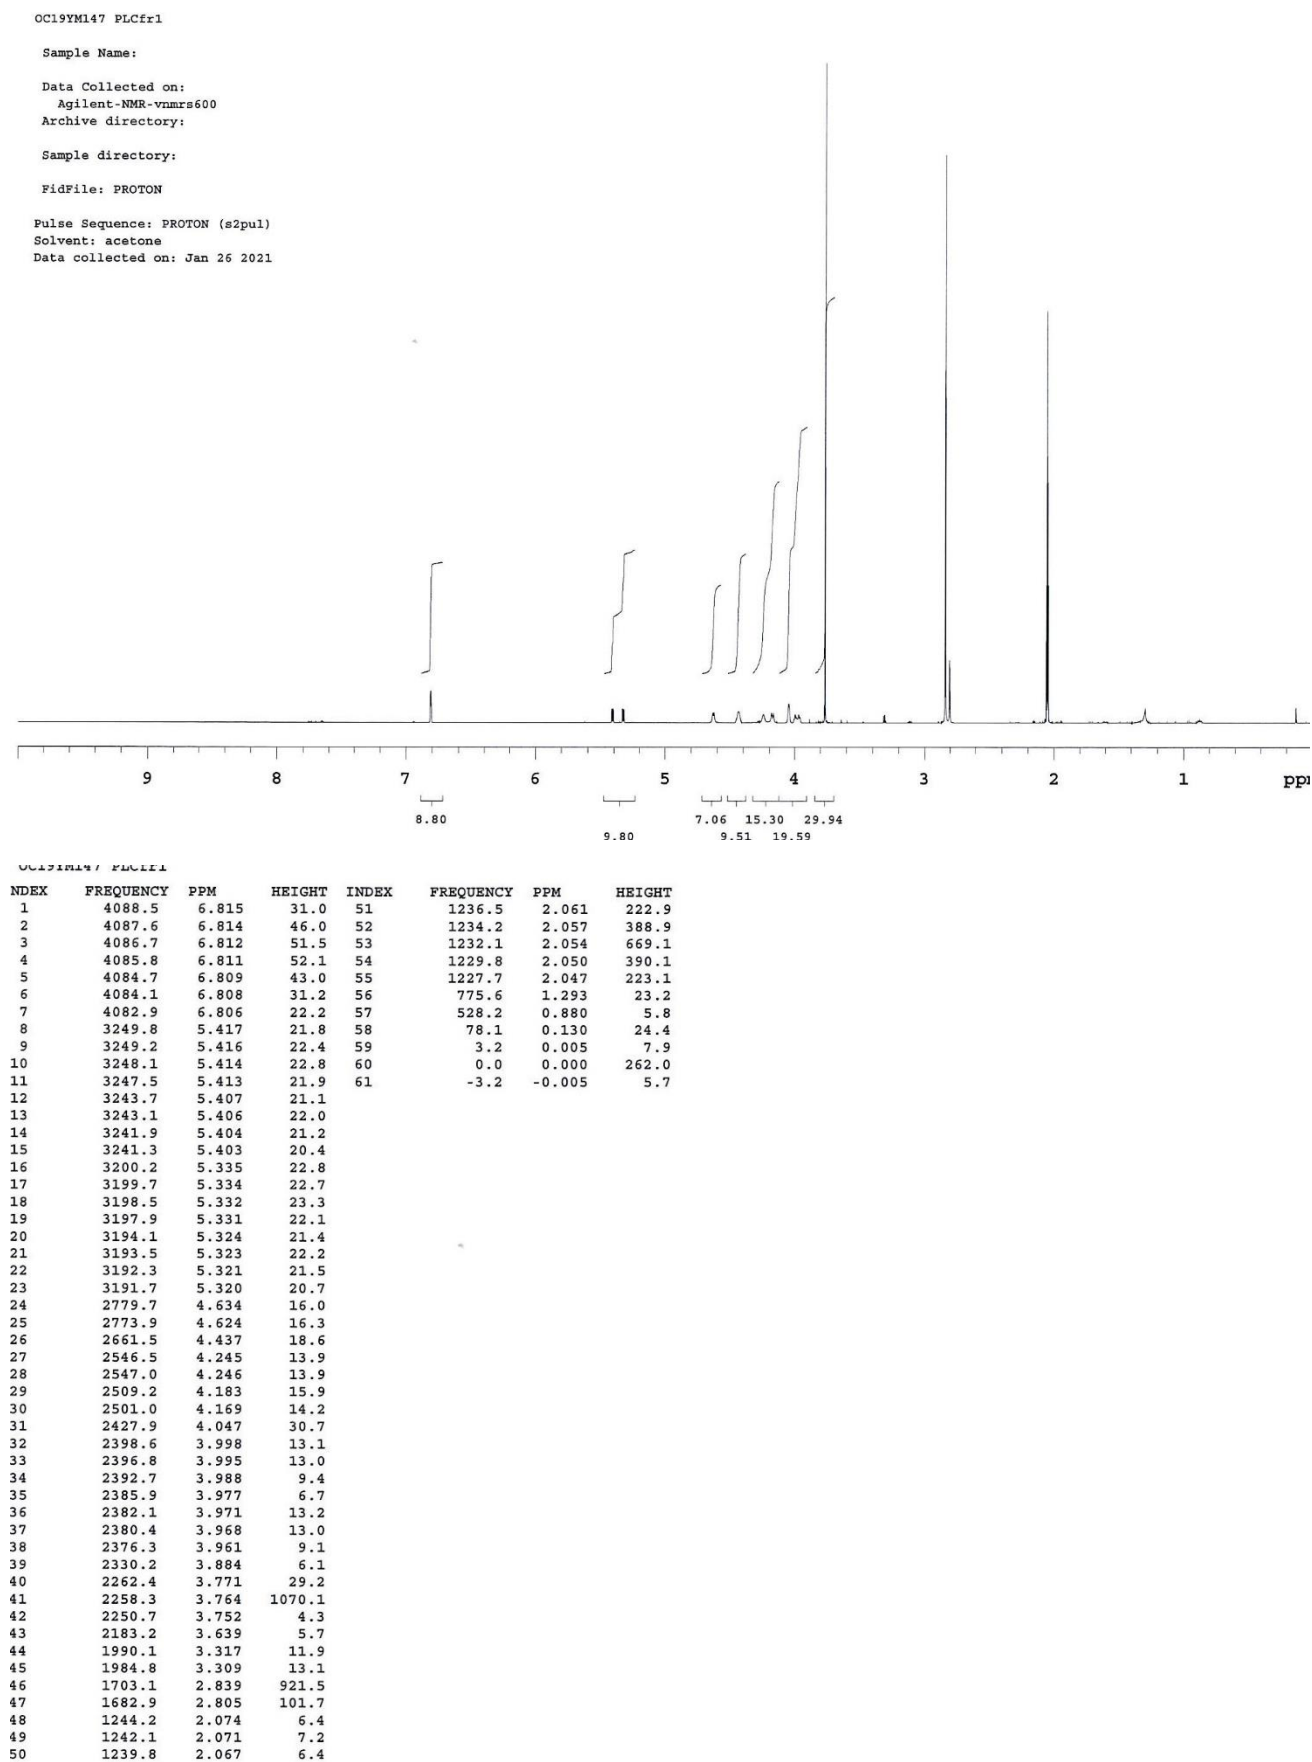



Figure S8.  $^{13}\text{C}$ -NMR spectrum of (+)-**1F** in acetone- $\text{d}_6$  (150 MHz)

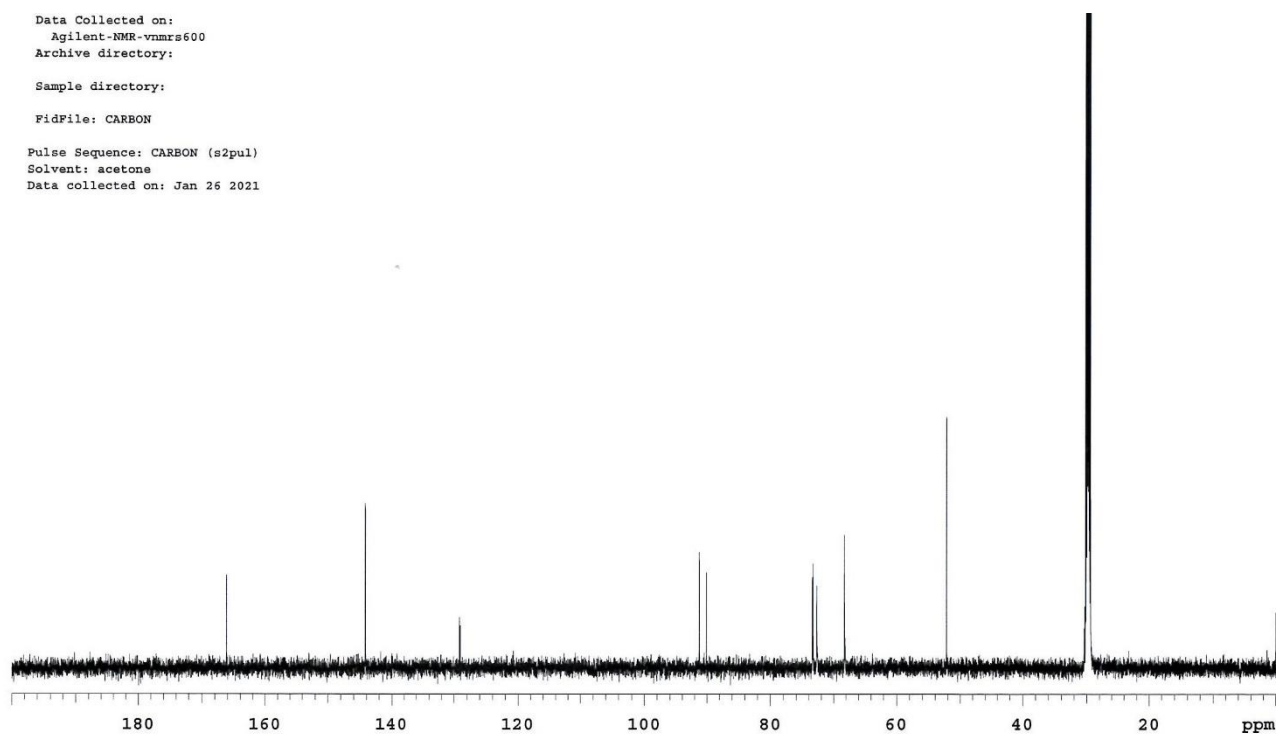

| INDEX | FREQUENCY | PPM     | HEIGHT |
|-------|-----------|---------|--------|
| 1     | 25068.3   | 166.187 | 19.9   |
| 2     | 21753.0   | 144.208 | 34.9   |
| 3     | 21746.1   | 144.162 | 33.6   |
| 4     | 19483.9   | 129.165 | 11.0   |
| 5     | 19465.4   | 129.043 | 9.2    |
| 6     | 13764.1   | 91.247  | 24.7   |
| 7     | 13596.5   | 90.136  | 20.5   |
| 8     | 11081.1   | 73.461  | 19.4   |
| 9     | 11060.3   | 73.323  | 22.3   |
| 10    | 10970.1   | 72.725  | 17.6   |
| 11    | 10300.8   | 68.288  | 28.1   |
| 12    | 10298.5   | 68.272  | 28.3   |
| 13    | 10283.5   | 68.173  | 6.6    |
| 14    | 7874.5    | 52.202  | 53.2   |
| 15    | 4578.8    | 30.354  | 13.3   |
| 16    | 4560.3    | 30.232  | 444.8  |
| 17    | 4540.6    | 30.101  | 1385.7 |
| 18    | 4521.0    | 29.971  | 2346.9 |
| 19    | 4502.5    | 29.849  | 2554.4 |
| 20    | 4482.8    | 29.718  | 2720.0 |
| 21    | 4463.2    | 29.588  | 1387.5 |
| 22    | 4443.5    | 29.458  | 386.4  |
| 23    | -0.0      | -0.000  | 12.1   |

Figure S9. <sup>1</sup>H-NMR spectrum of (-)-10<sub>Br</sub> in acetone-d<sub>6</sub> (600 MHz)

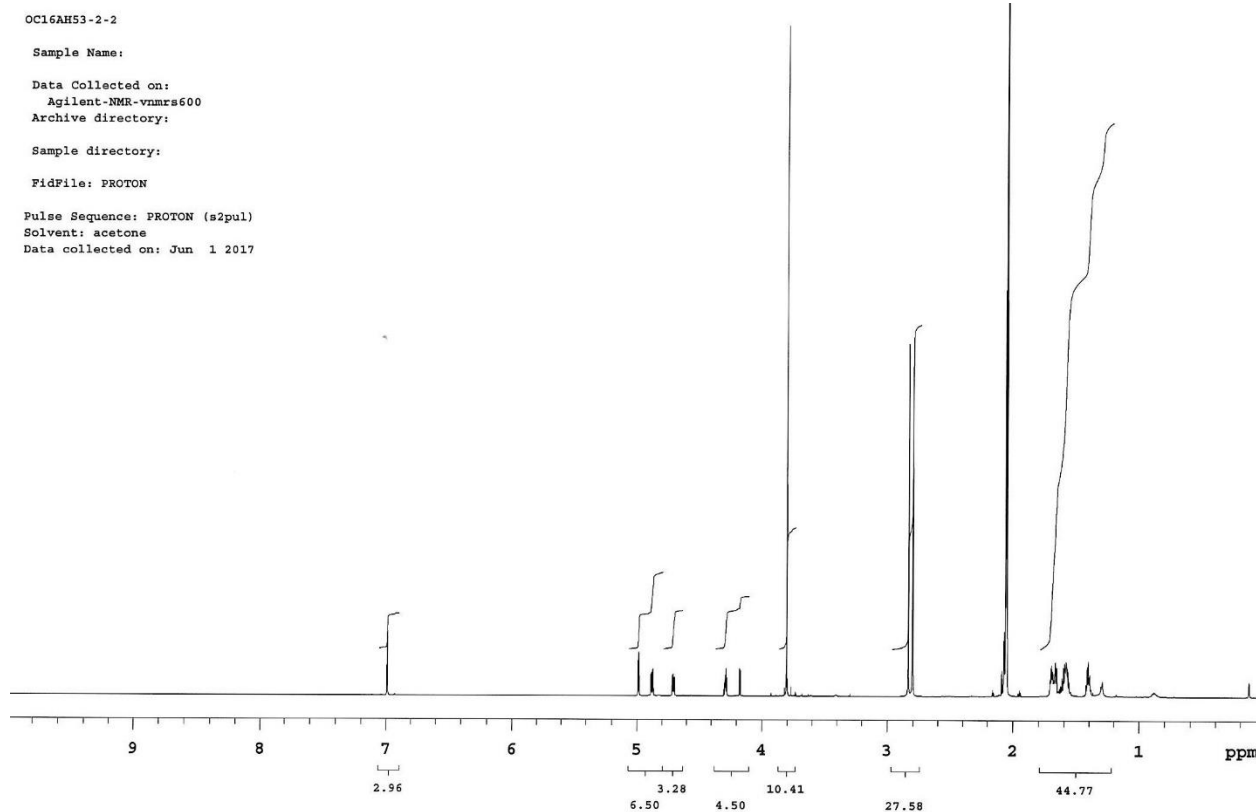

OC16AH53-2-2

| INDEX | FREQUENCY | PPM   | HEIGHT | INDEX | FREQUENCY | PPM   | HEIGHT |
|-------|-----------|-------|--------|-------|-----------|-------|--------|
| 1     | 4196.2    | 6.995 | 92.4   | 51    | 1227.7    | 2.047 | 1201.9 |
| 2     | 4194.7    | 6.992 | 167.2  | 52    | 1224.5    | 2.041 | 29.3   |
| 3     | 4192.9    | 6.989 | 100.9  | 53    | 1026.2    | 1.711 | 54.9   |
| 4     | 4191.5    | 6.987 | 197.1  | 54    | 1020.3    | 1.701 | 97.1   |
| 5     | 2993.1    | 4.989 | 134.6  | 55    | 1014.4    | 1.691 | 78.0   |
| 6     | 2989.3    | 4.983 | 120.1  | 56    | 1009.7    | 1.683 | 53.9   |
| 7     | 2988.7    | 4.982 | 130.5  | 57    | 1001.8    | 1.670 | 104.9  |
| 8     | 2932.0    | 4.888 | 67.2   | 58    | 996.5     | 1.661 | 89.1   |
| 9     | 2929.4    | 4.883 | 72.2   | 59    | 983.0     | 1.639 | 25.3   |
| 10    | 2928.8    | 4.882 | 68.9   | 60    | 977.1     | 1.629 | 33.4   |
| 11    | 2925.3    | 4.876 | 79.5   | 61    | 970.1     | 1.617 | 57.8   |
| 12    | 2922.4    | 4.871 | 83.3   | 62    | 964.2     | 1.607 | 90.0   |
| 13    | 2921.8    | 4.870 | 79.1   | 63    | 962.2     | 1.604 | 46.5   |
| 14    | 2829.3    | 4.716 | 39.1   | 64    | 958.4     | 1.598 | 101.7  |
| 15    | 2828.5    | 4.715 | 63.9   | 65    | 956.0     | 1.594 | 88.8   |
| 16    | 2825.8    | 4.710 | 41.8   | 66    | 951.9     | 1.587 | 106.2  |
| 17    | 2824.9    | 4.709 | 68.3   | 67    | 950.4     | 1.584 | 102.5  |
| 18    | 2822.3    | 4.705 | 36.5   | 68    | 946.6     | 1.578 | 73.4   |
| 19    | 2821.4    | 4.703 | 58.0   | 69    | 943.4     | 1.573 | 85.5   |
| 20    | 2818.8    | 4.699 | 35.7   | 70    | 940.2     | 1.567 | 35.0   |
| 21    | 2817.9    | 4.697 | 58.7   | 71    | 937.8     | 1.563 | 47.3   |
| 22    | 2574.0    | 4.291 | 49.8   | 72    | 855.4     | 1.426 | 37.4   |
| 23    | 2572.0    | 4.287 | 63.7   | 73    | 849.5     | 1.416 | 92.1   |
| 24    | 2570.5    | 4.285 | 55.5   | 74    | 843.6     | 1.406 | 108.6  |
| 25    | 2568.2    | 4.281 | 84.9   | 75    | 837.8     | 1.397 | 67.7   |
| 26    | 2566.1    | 4.278 | 33.6   | 76    | 832.2     | 1.387 | 22.6   |
| 27    | 2564.1    | 4.274 | 57.1   | 77    | 783.8     | 1.307 | 32.6   |
| 28    | 2503.9    | 4.174 | 85.4   | 78    | 775.6     | 1.293 | 47.4   |
| 29    | 2499.8    | 4.167 | 79.1   | 79    | 78.9      | 0.132 | 45.9   |
| 30    | 2292.9    | 3.822 | 25.6   | 80    | 0.0       | 0.000 | 570.0  |
| 31    | 2283.2    | 3.806 | 2040.0 |       |           |       |        |
| 32    | 2279.1    | 3.799 | 55.0   |       |           |       |        |
| 33    | 2277.4    | 3.796 | 22.7   |       |           |       |        |
| 34    | 2260.6    | 3.768 | 29.1   |       |           |       |        |
| 35    | 1701.6    | 2.837 | 1071.5 |       |           |       |        |
| 36    | 1682.3    | 2.804 | 752.2  |       |           |       |        |
| 37    | 1681.4    | 2.803 | 930.2  |       |           |       |        |
| 38    | 1253.9    | 2.090 | 70.6   |       |           |       |        |
| 39    | 1253.0    | 2.089 | 77.5   |       |           |       |        |
| 40    | 1252.1    | 2.087 | 79.9   |       |           |       |        |
| 41    | 1245.4    | 2.076 | 90.4   |       |           |       |        |
| 42    | 1244.5    | 2.074 | 170.4  |       |           |       |        |
| 43    | 1242.1    | 2.071 | 197.4  |       |           |       |        |
| 44    | 1241.0    | 2.069 | 100.9  |       |           |       |        |
| 45    | 1240.1    | 2.067 | 181.3  |       |           |       |        |
| 46    | 1239.2    | 2.066 | 77.4   |       |           |       |        |
| 47    | 1236.5    | 2.061 | 1234.5 |       |           |       |        |
| 48    | 1234.5    | 2.058 | 2176.6 |       |           |       |        |
| 49    | 1232.1    | 2.054 | 3577.8 |       |           |       |        |
| 50    | 1230.1    | 2.051 | 2143.0 |       |           |       |        |

Figure S10.  $^1\text{H}$ -NMR spectrum of (-)-**10**<sub>Br</sub> in  $\text{CDCl}_3$  (600 MHz)

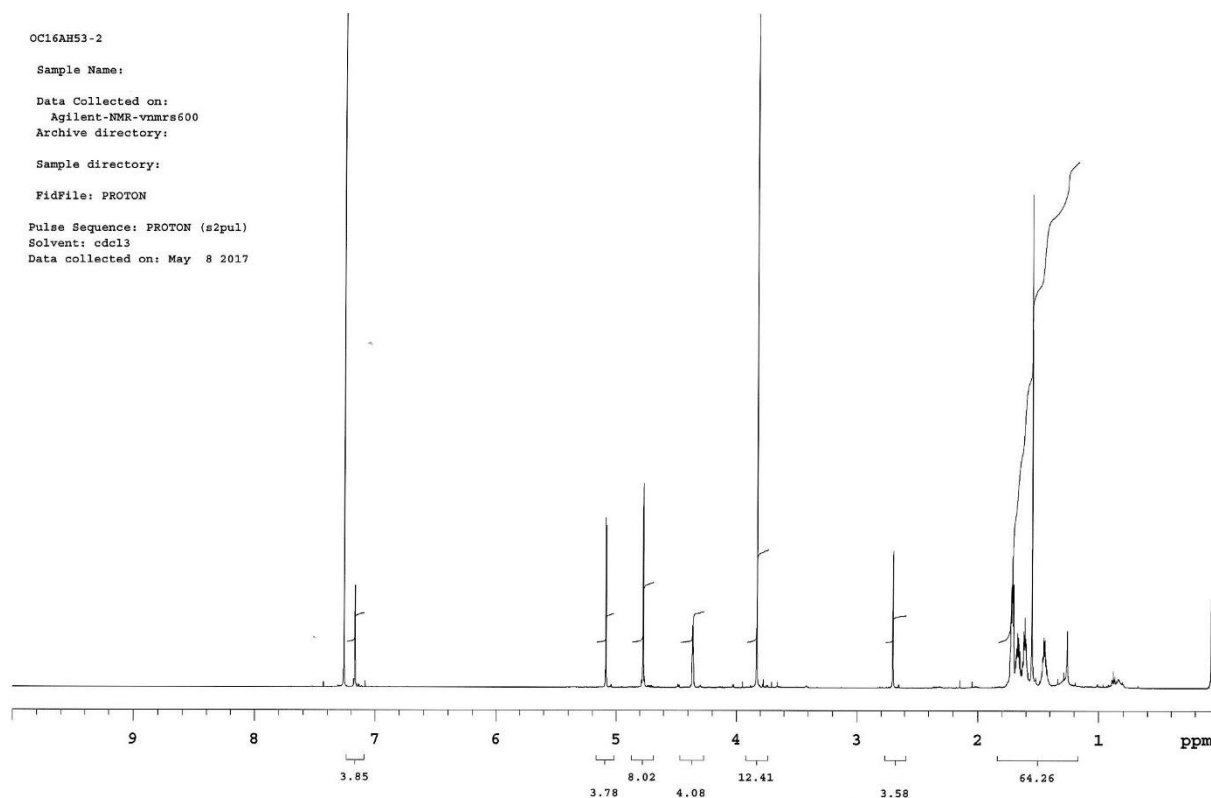

OC16AH53-2

| INDEX | FREQUENCY | PPM   | HEIGHT |
|-------|-----------|-------|--------|
| 1     | 4355.8    | 7.261 | 735.3  |
| 2     | 4302.7    | 7.172 | 81.5   |
| 3     | 4301.8    | 7.171 | 78.4   |
| 4     | 4300.9    | 7.169 | 86.1   |
| 5     | 4299.8    | 7.167 | 81.4   |
| 6     | 3053.8    | 5.091 | 143.1  |
| 7     | 3050.0    | 5.084 | 136.3  |
| 8     | 2864.8    | 4.776 | 152.0  |
| 9     | 2862.8    | 4.772 | 169.0  |
| 10    | 2861.3    | 4.770 | 172.1  |
| 11    | 2620.1    | 4.368 | 21.2   |
| 12    | 2617.8    | 4.364 | 41.3   |
| 13    | 2616.3    | 4.361 | 52.6   |
| 14    | 2615.4    | 4.360 | 40.1   |
| 15    | 2614.2    | 4.358 | 51.2   |
| 16    | 2612.8    | 4.355 | 37.8   |
| 17    | 2610.4    | 4.351 | 20.4   |
| 18    | 2299.1    | 3.832 | 50.3   |
| 19    | 2296.4    | 3.828 | 1140.3 |
| 20    | 1621.2    | 2.703 | 111.7  |
| 21    | 1618.9    | 2.699 | 115.3  |
| 22    | 1034.1    | 1.724 | 85.5   |
| 23    | 1029.1    | 1.715 | 109.5  |
| 24    | 1022.9    | 1.705 | 87.7   |
| 25    | 1013.5    | 1.690 | 23.2   |
| 26    | 1008.0    | 1.680 | 33.6   |
| 27    | 1002.7    | 1.671 | 46.4   |
| 28    | 997.7     | 1.663 | 42.5   |
| 29    | 991.5     | 1.653 | 31.3   |
| 30    | 985.4     | 1.643 | 16.0   |
| 31    | 978.9     | 1.632 | 22.4   |
| 32    | 972.7     | 1.622 | 48.0   |
| 33    | 966.9     | 1.612 | 59.2   |
| 34    | 961.3     | 1.602 | 42.0   |
| 35    | 955.7     | 1.593 | 18.5   |
| 36    | 953.4     | 1.589 | 15.2   |
| 37    | 930.5     | 1.551 | 414.7  |
| 38    | 880.9     | 1.468 | 13.4   |
| 39    | 875.0     | 1.459 | 26.7   |
| 40    | 869.8     | 1.450 | 42.5   |
| 41    | 864.5     | 1.441 | 40.5   |
| 42    | 858.6     | 1.431 | 24.4   |
| 43    | 853.3     | 1.422 | 15.9   |
| 44    | 770.6     | 1.285 | 13.5   |
| 45    | 752.4     | 1.254 | 48.2   |
| 46    | 528.2     | 0.880 | 14.5   |
| 47    | 41.4      | 0.069 | 75.1   |
| 48    | 0.0       | 0.000 | 252.3  |

Figure S11.  $^{13}\text{C}$ -NMR spectrum of (-)-10Br in acetone- $\text{d}_6$  (150 MHz)

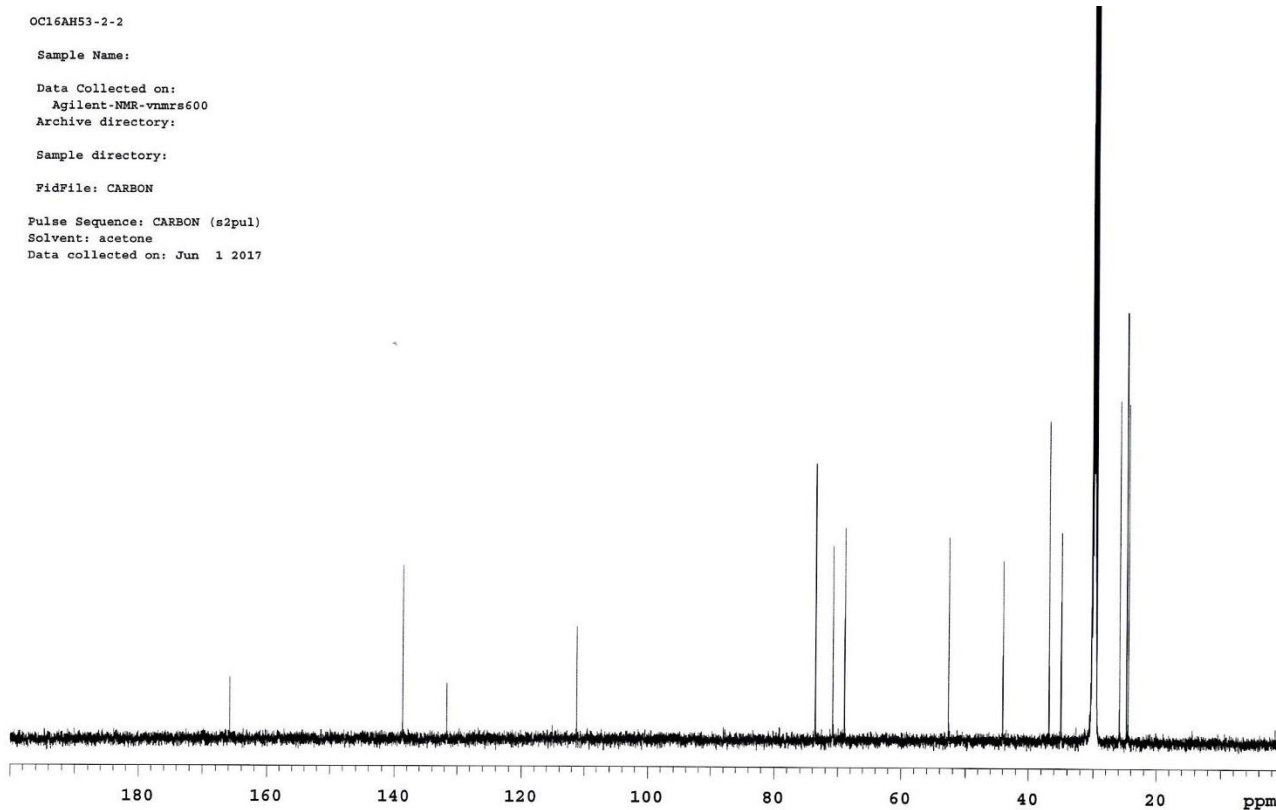

OC16AH53-2-2

| INDEX | FREQUENCY | PPM     | HEIGHT |
|-------|-----------|---------|--------|
| 1     | 31119.8   | 206.304 | 77.1   |
| 2     | 31100.2   | 206.174 | 4823.7 |
| 3     | 31080.5   | 206.044 | 63.0   |
| 4     | 25007.1   | 165.780 | 13.4   |
| 5     | 20914.9   | 138.652 | 36.8   |
| 6     | 19850.3   | 131.594 | 12.2   |
| 7     | 16763.9   | 111.133 | 24.1   |
| 8     | 11097.3   | 73.568  | 58.5   |
| 9     | 10680.0   | 70.801  | 41.2   |
| 10    | 10403.7   | 68.970  | 26.0   |
| 11    | 10392.2   | 68.893  | 45.0   |
| 12    | 7936.9    | 52.616  | 43.1   |
| 13    | 6639.9    | 44.018  | 38.3   |
| 14    | 5549.8    | 36.792  | 67.5   |
| 15    | 5268.9    | 34.929  | 44.2   |
| 16    | 5266.6    | 34.914  | 33.0   |
| 17    | 4614.6    | 30.592  | 6.2    |
| 18    | 4578.8    | 30.354  | 28.6   |
| 19    | 4560.3    | 30.232  | 501.5  |
| 20    | 4540.6    | 30.101  | 1662.8 |
| 21    | 4521.0    | 29.971  | 3020.1 |
| 22    | 4502.5    | 29.849  | 2690.9 |
| 23    | 4482.8    | 29.718  | 3021.6 |
| 24    | 4463.2    | 29.588  | 1659.6 |
| 25    | 4443.5    | 29.458  | 496.2  |
| 26    | 3897.9    | 25.841  | 71.7   |
| 27    | 3728.0    | 24.714  | 90.3   |
| 28    | 3685.2    | 24.431  | 71.0   |
| 29    | -0.0      | -0.000  | 10.8   |

Figure S12. <sup>1</sup>H-NMR spectrum of (+)-10<sub>Br</sub> in acetone-d<sub>6</sub> (600 MHz)

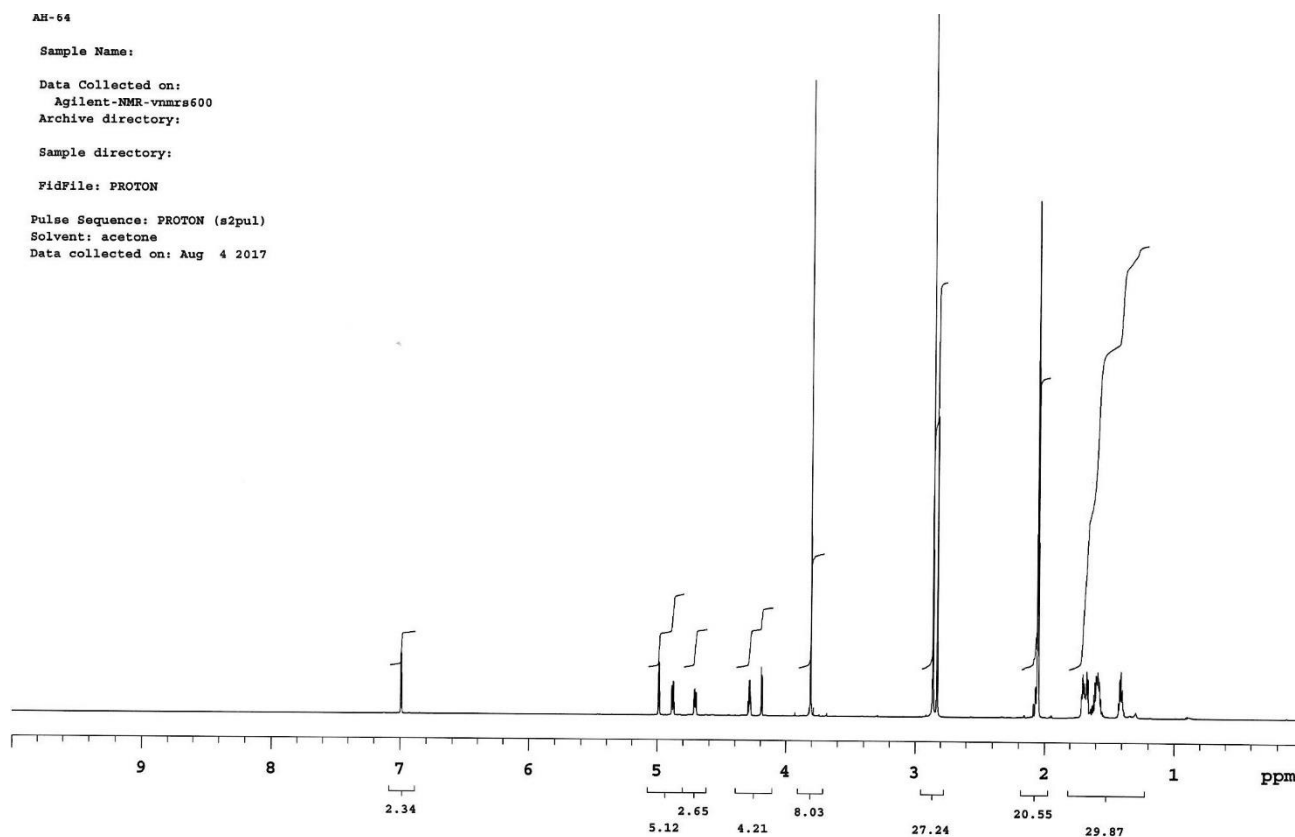

AH-64

| INDEX | FREQUENCY | PPM   | HEIGHT | INDEX | FREQUENCY | PPM    | HEIGHT |
|-------|-----------|-------|--------|-------|-----------|--------|--------|
| 1     | 4196.2    | 6.995 | 64.2   | 51    | 983.0     | 1.639  | 10.2   |
| 2     | 4194.7    | 6.992 | 44.9   | 52    | 977.1     | 1.629  | 13.7   |
| 3     | 4192.9    | 6.989 | 64.0   | 53    | 970.4     | 1.618  | 25.3   |
| 4     | 4191.5    | 6.987 | 43.0   | 54    | 964.2     | 1.607  | 38.5   |
| 5     | 2993.4    | 4.990 | 57.7   | 55    | 962.2     | 1.604  | 20.1   |
| 6     | 2989.0    | 4.982 | 55.8   | 56    | 958.4     | 1.598  | 45.4   |
| 7     | 2932.3    | 4.888 | 31.4   | 57    | 956.0     | 1.594  | 41.1   |
| 8     | 2929.4    | 4.883 | 31.5   | 58    | 952.2     | 1.587  | 48.7   |
| 9     | 2925.3    | 4.876 | 36.3   | 59    | 950.2     | 1.584  | 48.6   |
| 10    | 2922.1    | 4.871 | 35.4   | 60    | 946.9     | 1.578  | 34.2   |
| 11    | 2829.3    | 4.716 | 27.2   | 61    | 943.7     | 1.573  | 39.1   |
| 12    | 2828.5    | 4.715 | 21.1   | 62    | 940.2     | 1.567  | 15.6   |
| 13    | 2825.8    | 4.710 | 28.4   | 63    | 937.8     | 1.563  | 21.1   |
| 14    | 2824.6    | 4.709 | 21.7   | 64    | 930.5     | 1.551  | 7.4    |
| 15    | 2822.3    | 4.705 | 24.6   | 65    | 855.4     | 1.426  | 16.5   |
| 16    | 2818.5    | 4.698 | 24.7   | 66    | 849.5     | 1.416  | 41.6   |
| 17    | 2817.6    | 4.697 | 18.3   | 67    | 843.6     | 1.406  | 49.7   |
| 18    | 2578.1    | 4.298 | 15.6   | 68    | 837.8     | 1.397  | 30.7   |
| 19    | 2574.0    | 4.291 | 37.8   | 69    | 832.2     | 1.387  | 9.5    |
| 20    | 2572.0    | 4.287 | 19.8   | 70    | -0.0      | -0.000 | 41.3   |
| 21    | 2570.2    | 4.284 | 38.3   |       |           |        |        |
| 22    | 2567.9    | 4.281 | 25.4   |       |           |        |        |
| 23    | 2566.1    | 4.278 | 20.6   |       |           |        |        |
| 24    | 2564.1    | 4.274 | 14.6   |       |           |        |        |
| 25    | 2515.9    | 4.194 | 52.0   |       |           |        |        |
| 26    | 2511.8    | 4.187 | 43.1   |       |           |        |        |
| 27    | 2291.8    | 3.820 | 9.2    |       |           |        |        |
| 28    | 2283.5    | 3.807 | 671.5  |       |           |        |        |
| 29    | 2279.1    | 3.799 | 13.6   |       |           |        |        |
| 30    | 2277.4    | 3.796 | 8.4    |       |           |        |        |
| 31    | 2270.3    | 3.785 | 9.0    |       |           |        |        |
| 32    | 1715.7    | 2.860 | 1134.6 |       |           |        |        |
| 33    | 1696.7    | 2.828 | 268.6  |       |           |        |        |
| 34    | 1695.8    | 2.827 | 317.7  |       |           |        |        |
| 35    | 1254.4    | 2.091 | 12.5   |       |           |        |        |
| 36    | 1253.6    | 2.090 | 15.1   |       |           |        |        |
| 37    | 1245.1    | 2.075 | 31.6   |       |           |        |        |
| 38    | 1242.7    | 2.072 | 33.5   |       |           |        |        |
| 39    | 1240.7    | 2.068 | 33.3   |       |           |        |        |
| 40    | 1237.1    | 2.062 | 193.8  |       |           |        |        |
| 41    | 1235.1    | 2.059 | 376.5  |       |           |        |        |
| 42    | 1232.7    | 2.055 | 545.2  |       |           |        |        |
| 43    | 1230.7    | 2.051 | 369.8  |       |           |        |        |
| 44    | 1228.3    | 2.048 | 184.8  |       |           |        |        |
| 45    | 1026.2    | 1.711 | 26.1   |       |           |        |        |
| 46    | 1020.3    | 1.701 | 46.7   |       |           |        |        |
| 47    | 1014.4    | 1.691 | 37.1   |       |           |        |        |
| 48    | 1010.3    | 1.684 | 25.9   |       |           |        |        |
| 49    | 1002.4    | 1.671 | 49.7   |       |           |        |        |
| 50    | 996.8     | 1.662 | 41.8   |       |           |        |        |

Figure S13.  $^{13}\text{C}$ -NMR spectrum of (+)-**10**<sub>Br</sub> in acetone- $\text{d}_6$  (150 MHz)

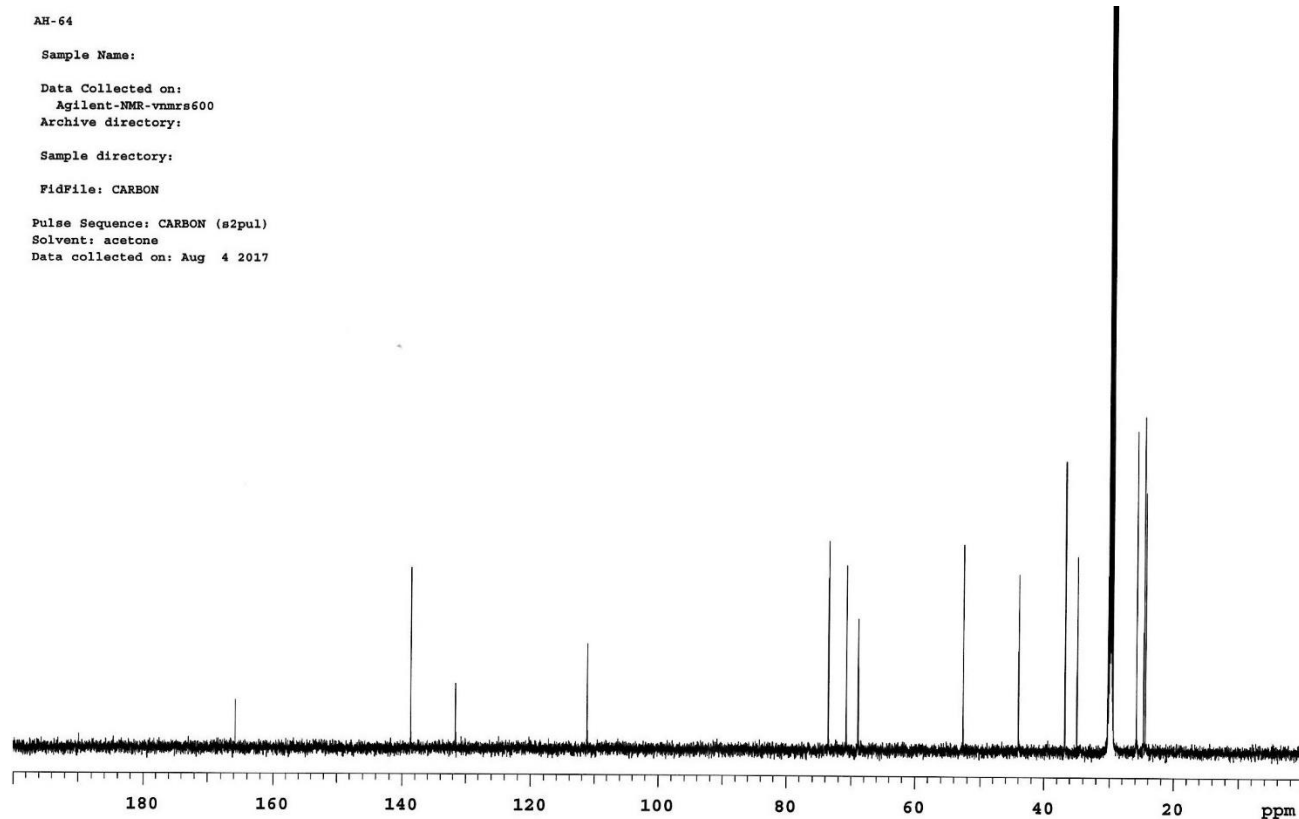

| INDEX | FREQUENCY | PPM     | HEIGHT |
|-------|-----------|---------|--------|
| 1     | 25005.9   | 165.773 | 10.1   |
| 2     | 20916.1   | 138.660 | 37.6   |
| 3     | 19848.0   | 131.579 | 13.6   |
| 4     | 16762.7   | 111.126 | 21.9   |
| 5     | 11096.1   | 73.560  | 43.4   |
| 6     | 10678.8   | 70.794  | 38.4   |
| 7     | 10403.7   | 68.970  | 27.3   |
| 8     | 10392.2   | 68.893  | 17.2   |
| 9     | 7936.9    | 52.616  | 42.9   |
| 10    | 6638.7    | 44.010  | 36.8   |
| 11    | 5548.6    | 36.784  | 60.1   |
| 12    | 5268.9    | 34.929  | 25.5   |
| 13    | 5266.6    | 34.914  | 40.5   |
| 14    | 4577.6    | 30.347  | 11.4   |
| 15    | 4559.1    | 30.224  | 157.8  |
| 16    | 4540.6    | 30.101  | 595.7  |
| 17    | 4521.0    | 29.971  | 1274.4 |
| 18    | 4501.3    | 29.841  | 1321.1 |
| 19    | 4482.8    | 29.718  | 952.9  |
| 20    | 4463.2    | 29.588  | 606.2  |
| 21    | 4443.5    | 29.458  | 213.9  |
| 22    | 3896.8    | 25.833  | 66.4   |
| 23    | 3726.8    | 24.706  | 69.3   |
| 24    | 3684.1    | 24.423  | 53.7   |

Figure S14.  $^1\text{H}$ -NMR spectrum of (-)-**1**<sub>Br</sub> in methanol- $d_4$  (600 MHz)

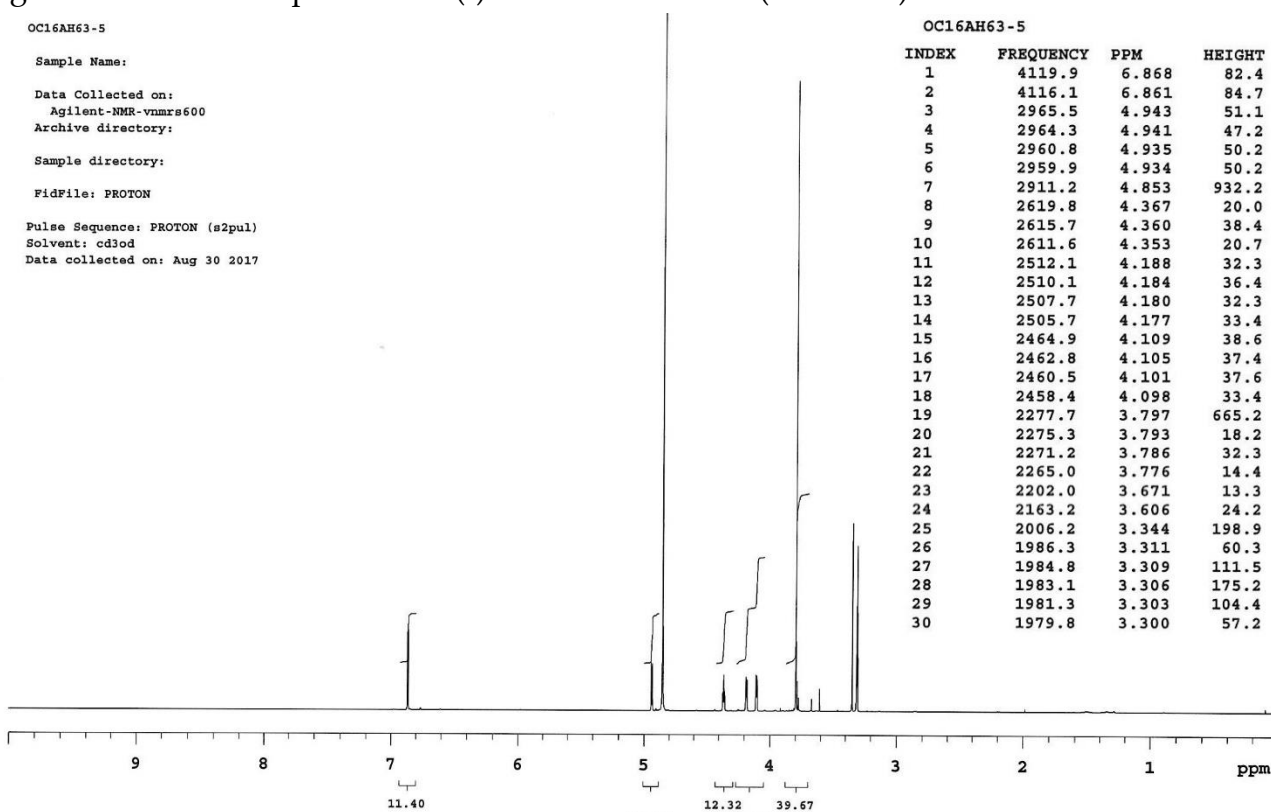

Figure S15.  $^{13}\text{C}$ -NMR spectrum of (-)-**1**<sub>Br</sub> in methanol- $d_4$  (150 MHz)

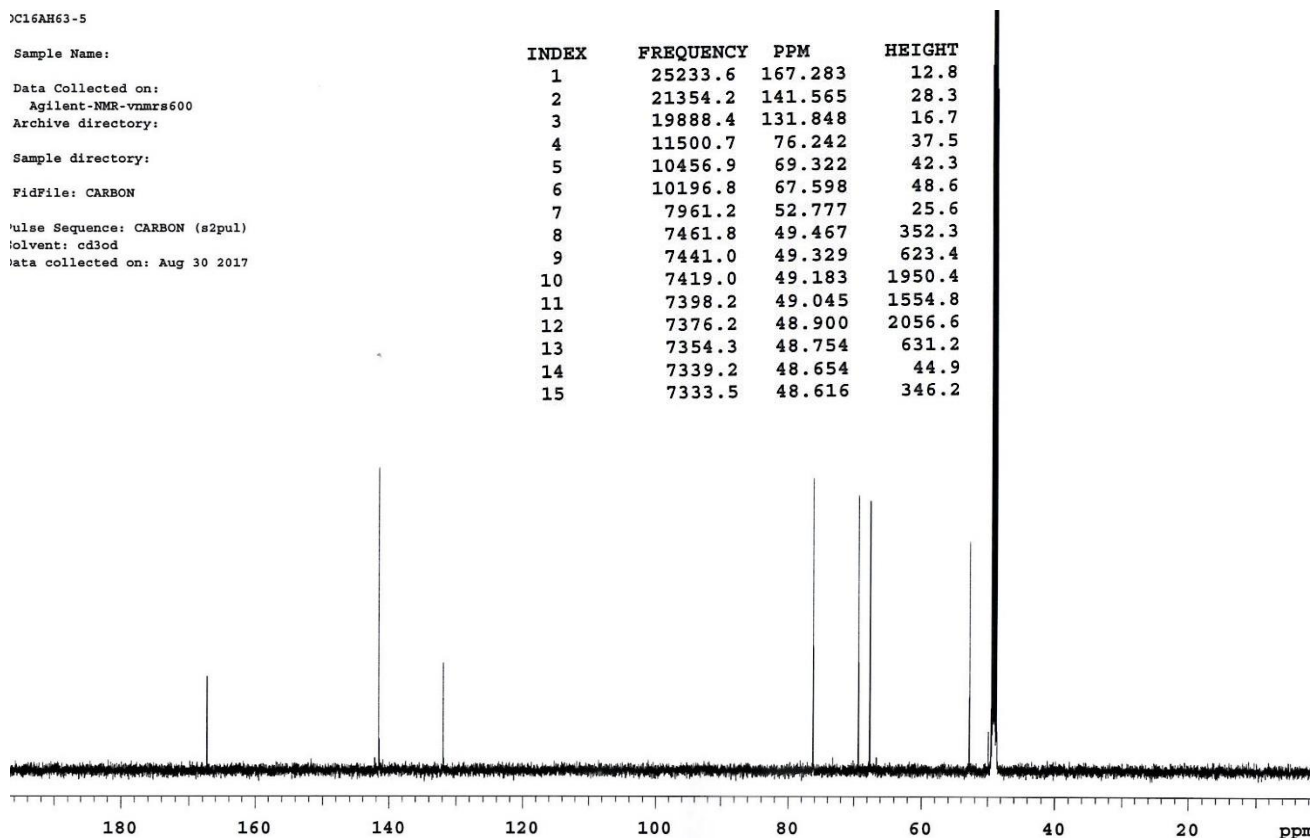

Figure S16.  $^1\text{H}$ -NMR spectrum of (+)-**1**<sub>Br</sub> in methanol- $\text{d}_4$  (600 MHz)

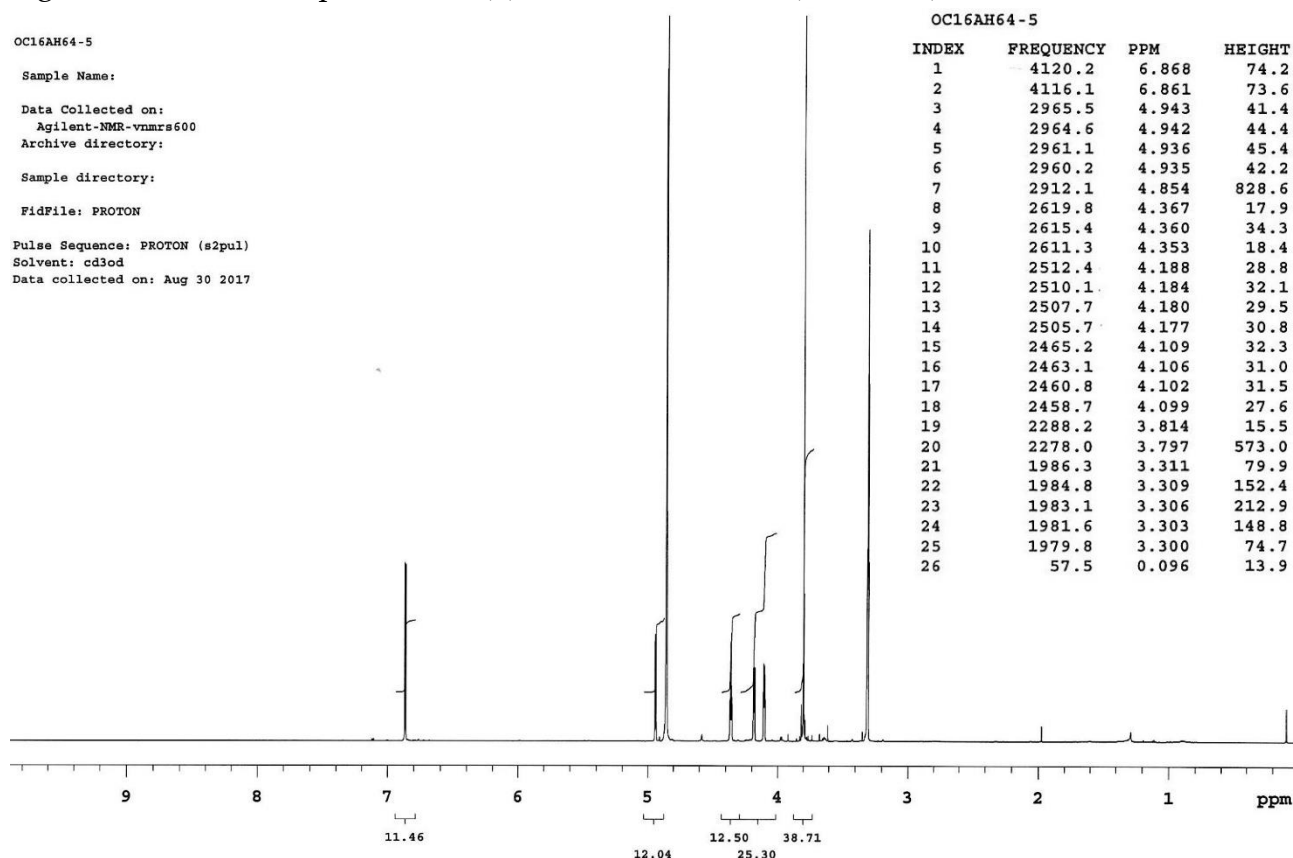

Figure S17.  $^{13}\text{C}$ -NMR spectrum of (+)-**1**<sub>Br</sub> in methanol- $\text{d}_4$  (150 MHz)

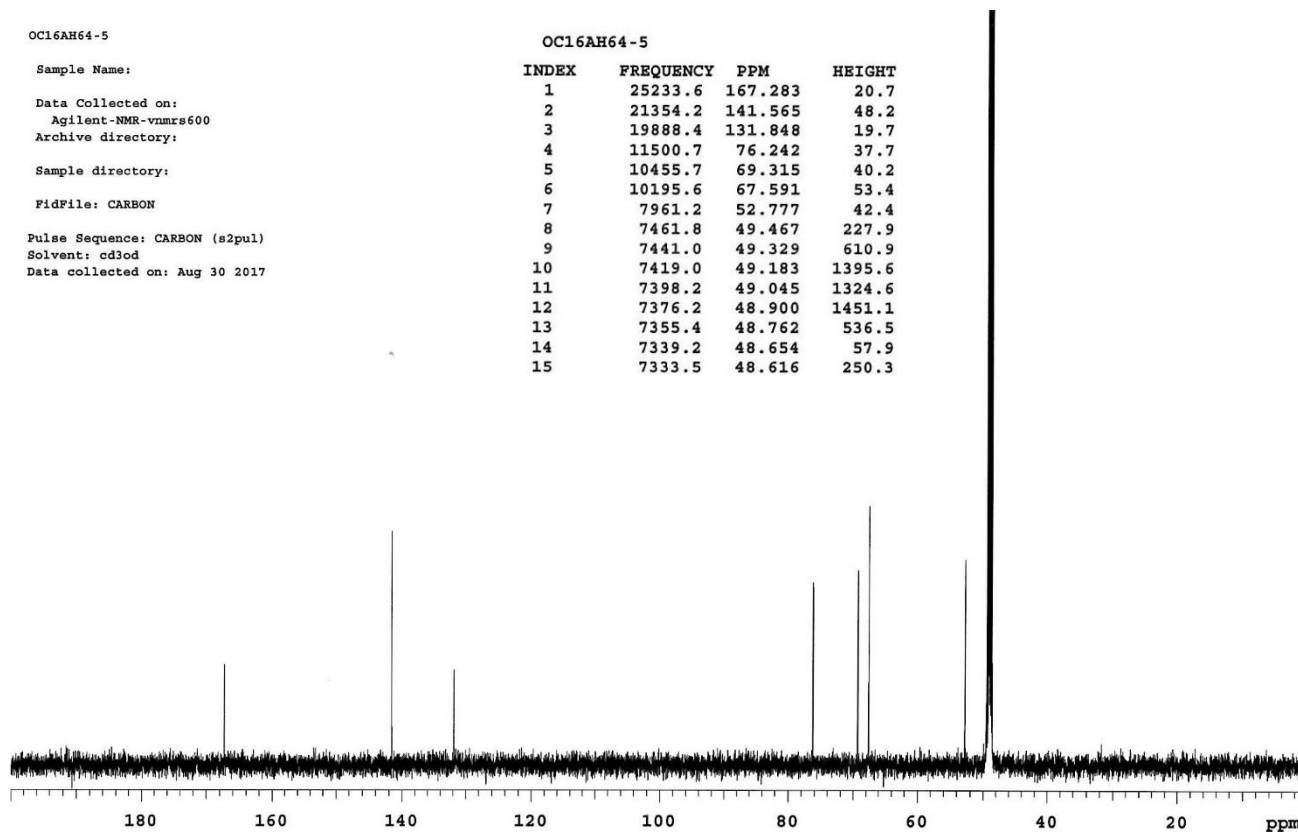



Figure S18. <sup>1</sup>H-NMR spectrum of (-)-10<sub>I</sub> in CDCl<sub>3</sub> (600 MHz)

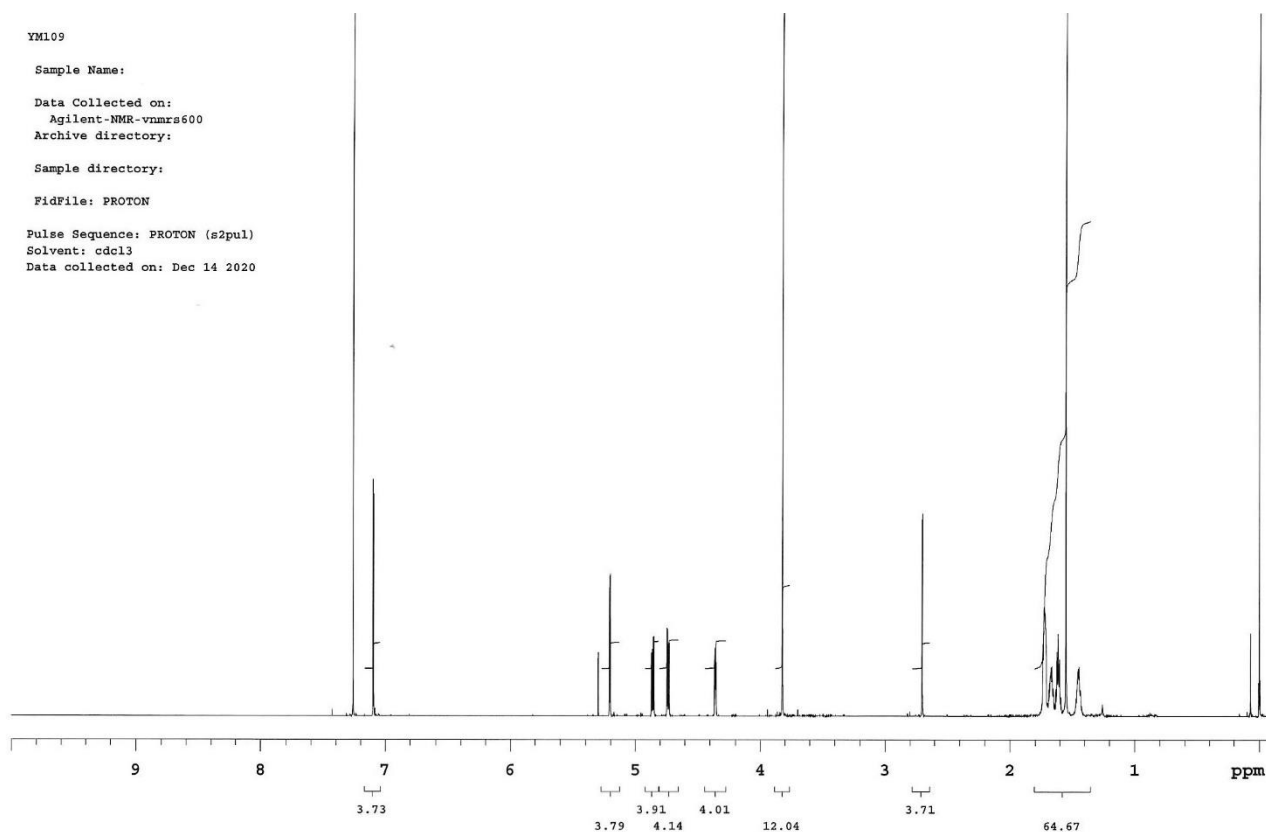

YML09

| INDEX | FREQUENCY | PPM   | HEIGHT | INDEX | FREQUENCY | PPM    | HEIGHT |
|-------|-----------|-------|--------|-------|-----------|--------|--------|
| 1     | 4355.8    | 7.261 | 531.7  | 51    | 854.5     | 1.424  | 4.1    |
| 2     | 4259.5    | 7.100 | 93.2   | 52    | 753.0     | 1.255  | 4.7    |
| 3     | 4256.3    | 7.095 | 87.6   | 53    | 41.4      | 0.069  | 32.8   |
| 4     | 3179.7    | 5.300 | 25.1   | 54    | 3.2       | 0.005  | 13.3   |
| 5     | 3125.7    | 5.210 | 55.3   | 55    | 0.0       | 0.000  | 536.4  |
| 6     | 3122.5    | 5.205 | 56.1   | 56    | -3.2      | -0.005 | 14.5   |
| 7     | 2921.2    | 4.869 | 25.1   |       |           |        |        |
| 8     | 2917.1    | 4.863 | 26.4   |       |           |        |        |
| 9     | 2913.3    | 4.856 | 31.2   |       |           |        |        |
| 10    | 2909.1    | 4.849 | 31.5   |       |           |        |        |
| 11    | 2846.1    | 4.744 | 34.8   |       |           |        |        |
| 12    | 2843.1    | 4.739 | 34.2   |       |           |        |        |
| 13    | 2838.4    | 4.732 | 28.5   |       |           |        |        |
| 14    | 2835.2    | 4.726 | 29.0   |       |           |        |        |
| 15    | 2620.4    | 4.368 | 20.8   |       |           |        |        |
| 16    | 2618.1    | 4.364 | 23.9   |       |           |        |        |
| 17    | 2616.9    | 4.362 | 24.7   |       |           |        |        |
| 18    | 2616.3    | 4.361 | 26.4   |       |           |        |        |
| 19    | 2614.8    | 4.359 | 26.7   |       |           |        |        |
| 20    | 2613.9    | 4.357 | 24.6   |       |           |        |        |
| 21    | 2613.1    | 4.356 | 23.2   |       |           |        |        |
| 22    | 2610.7    | 4.352 | 21.2   |       |           |        |        |
| 23    | 2293.5    | 3.823 | 593.5  |       |           |        |        |
| 24    | 1623.0    | 2.705 | 77.5   |       |           |        |        |
| 25    | 1620.7    | 2.702 | 80.0   |       |           |        |        |
| 26    | 1042.3    | 1.737 | 23.5   |       |           |        |        |
| 27    | 1038.2    | 1.731 | 43.2   |       |           |        |        |
| 28    | 1035.3    | 1.726 | 43.4   |       |           |        |        |
| 29    | 1032.3    | 1.721 | 40.1   |       |           |        |        |
| 30    | 1030.0    | 1.717 | 34.3   |       |           |        |        |
| 31    | 1022.9    | 1.705 | 5.3    |       |           |        |        |
| 32    | 1018.5    | 1.698 | 5.2    |       |           |        |        |
| 33    | 1014.4    | 1.691 | 10.6   |       |           |        |        |
| 34    | 1011.5    | 1.686 | 13.2   |       |           |        |        |
| 35    | 1008.3    | 1.681 | 16.0   |       |           |        |        |
| 36    | 1003.3    | 1.672 | 19.3   |       |           |        |        |
| 37    | 999.7     | 1.667 | 19.2   |       |           |        |        |
| 38    | 993.3     | 1.656 | 11.0   |       |           |        |        |
| 39    | 987.1     | 1.645 | 5.4    |       |           |        |        |
| 40    | 980.4     | 1.634 | 10.8   |       |           |        |        |
| 41    | 974.5     | 1.624 | 25.4   |       |           |        |        |
| 42    | 968.6     | 1.615 | 32.5   |       |           |        |        |
| 43    | 962.5     | 1.604 | 22.4   |       |           |        |        |
| 44    | 956.9     | 1.595 | 7.6    |       |           |        |        |
| 45    | 930.8     | 1.552 | 833.3  |       |           |        |        |
| 46    | 881.8     | 1.470 | 6.3    |       |           |        |        |
| 47    | 875.6     | 1.460 | 13.6   |       |           |        |        |
| 48    | 870.9     | 1.452 | 18.4   |       |           |        |        |
| 49    | 866.8     | 1.445 | 19.6   |       |           |        |        |
| 50    | 860.9     | 1.435 | 10.4   |       |           |        |        |

Figure S19.  $^{13}\text{C}$ -NMR spectrum of (-)-10i in  $\text{CDCl}_3$  (150 MHz)

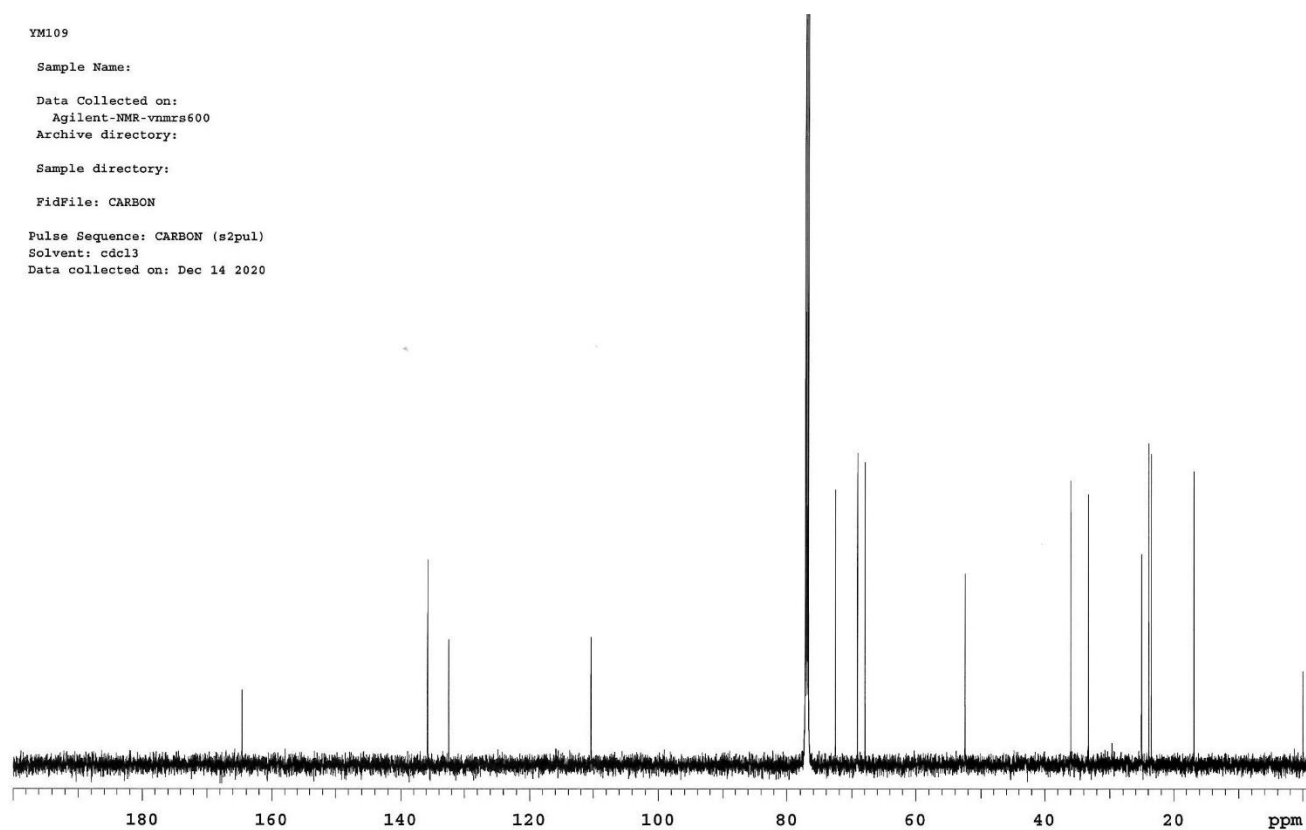

YMI09

| INDEX | FREQUENCY | PPM     | HEIGHT |
|-------|-----------|---------|--------|
| 1     | 24838.3   | 164.662 | 15.3   |
| 2     | 20486.1   | 135.810 | 42.0   |
| 3     | 19986.7   | 132.499 | 25.7   |
| 4     | 16652.9   | 110.398 | 26.1   |
| 5     | 11649.9   | 77.231  | 1316.3 |
| 6     | 11617.5   | 77.017  | 1199.5 |
| 7     | 11586.3   | 76.810  | 1306.7 |
| 8     | 10949.3   | 72.587  | 56.5   |
| 9     | 10431.5   | 69.154  | 64.1   |
| 10    | 10250.0   | 67.951  | 62.1   |
| 11    | 7914.9    | 52.471  | 39.3   |
| 12    | 5428.4    | 35.987  | 58.4   |
| 13    | 5020.4    | 33.282  | 55.6   |
| 14    | 3784.6    | 25.090  | 43.2   |
| 15    | 3613.6    | 23.956  | 66.1   |
| 16    | 3548.8    | 23.526  | 63.9   |
| 17    | 2539.7    | 16.836  | 60.4   |
| 18    | 0.0       | 0.000   | 19.1   |

Figure S20.  $^1\text{H}$ -NMR spectrum of (+)-**10i** in  $\text{CDCl}_3$  (400 MHz)

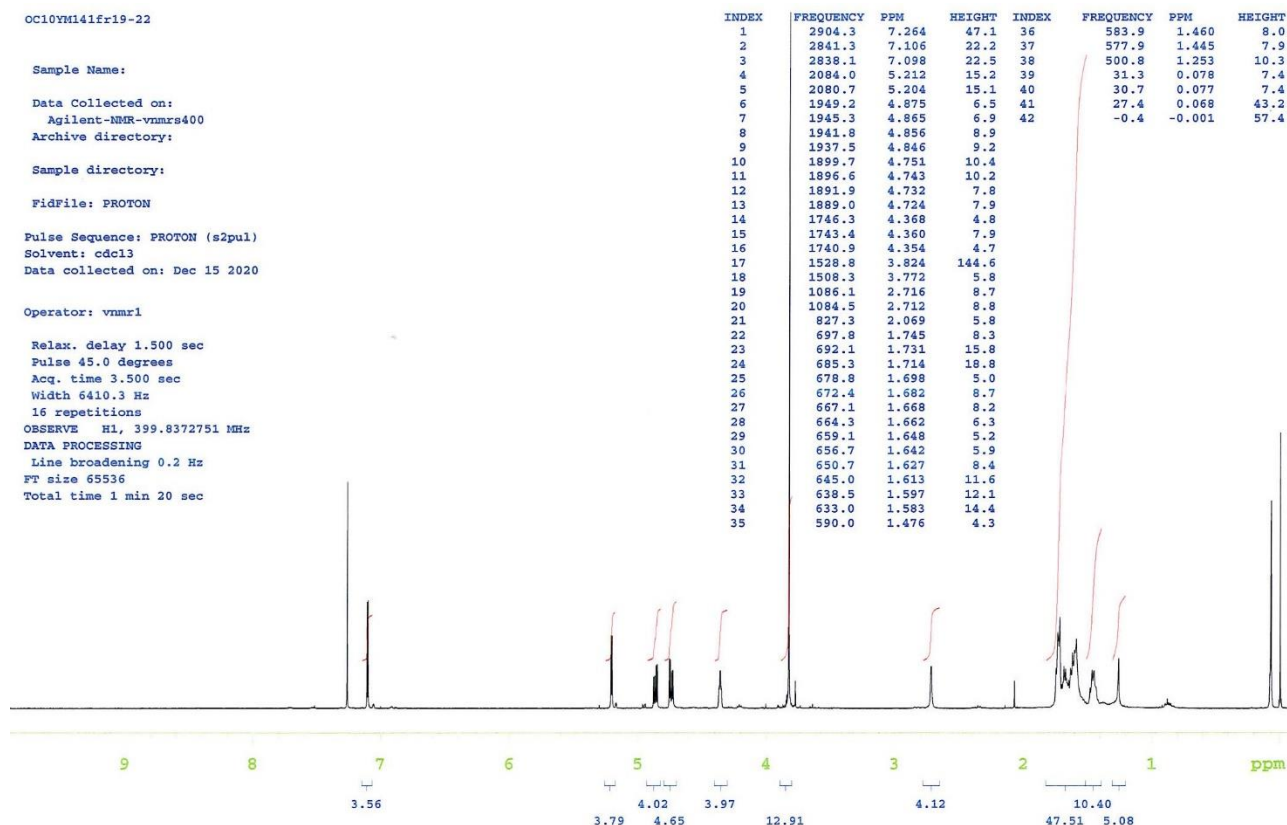

Figure S21.  $^{13}\text{C}$ -NMR spectrum of (+)-**10i** in  $\text{CDCl}_3$  (100 MHz)

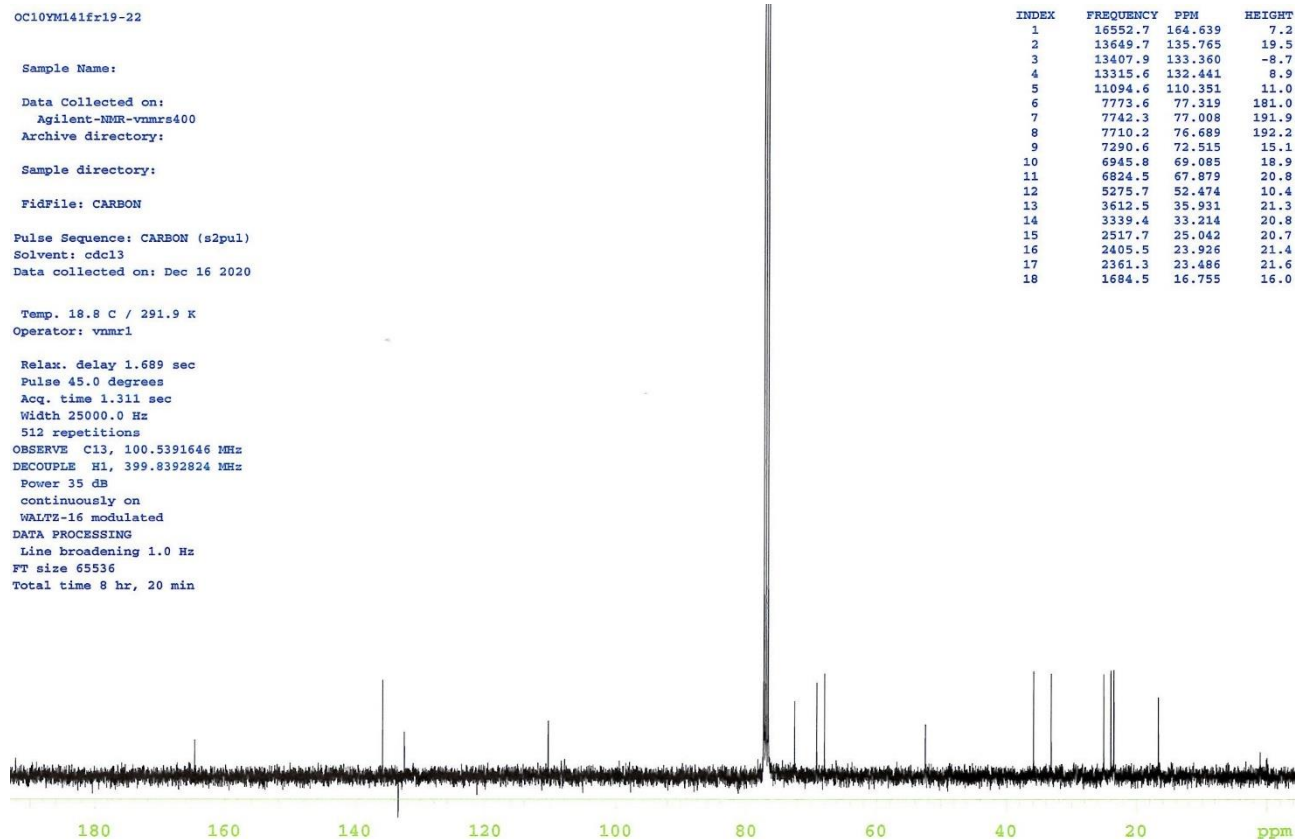

Figure S22. <sup>1</sup>H-NMR spectrum of (-)-1<sub>I</sub> in acetone-d<sub>6</sub> (600 MHz)

Data Collected on:  
Agilent-NMR-vnmrs600  
Archive directory:  
Sample directory:  
FidFile: PROTON  
Pulse Sequence: PROTON (s2pul)  
Solvent: acetone  
Data collected on: Jan 14 2021

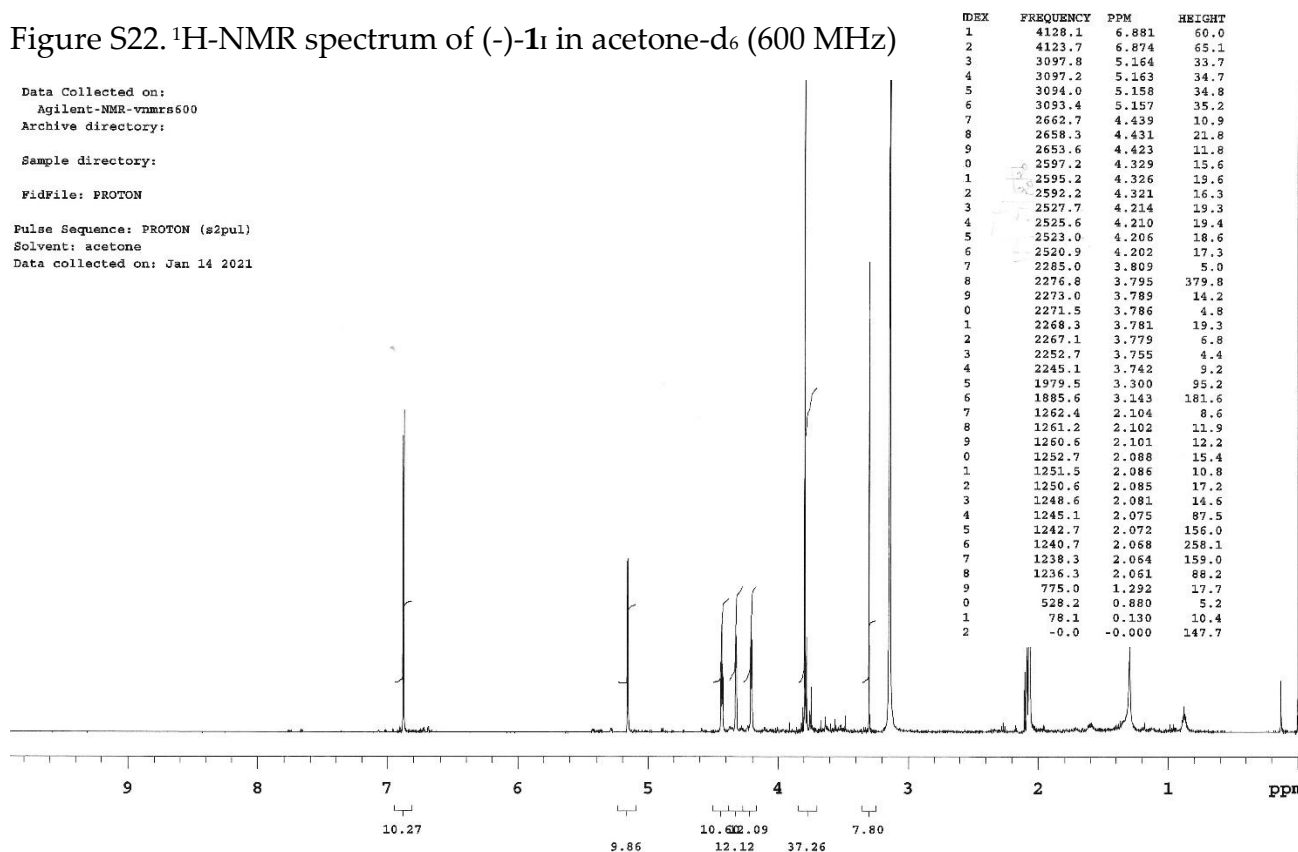

Figure S23. <sup>13</sup>C-NMR spectrum of (-)-1<sub>I</sub> in acetone-d<sub>6</sub> (150 MHz)

Data Collected on:  
Agilent-NMR-vnmrs600  
Archive directory:  
Sample directory:  
FidFile: CARBON  
Pulse Sequence: CARBON (s2pul)  
Solvent: acetone  
Data collected on: Jan 14 2021

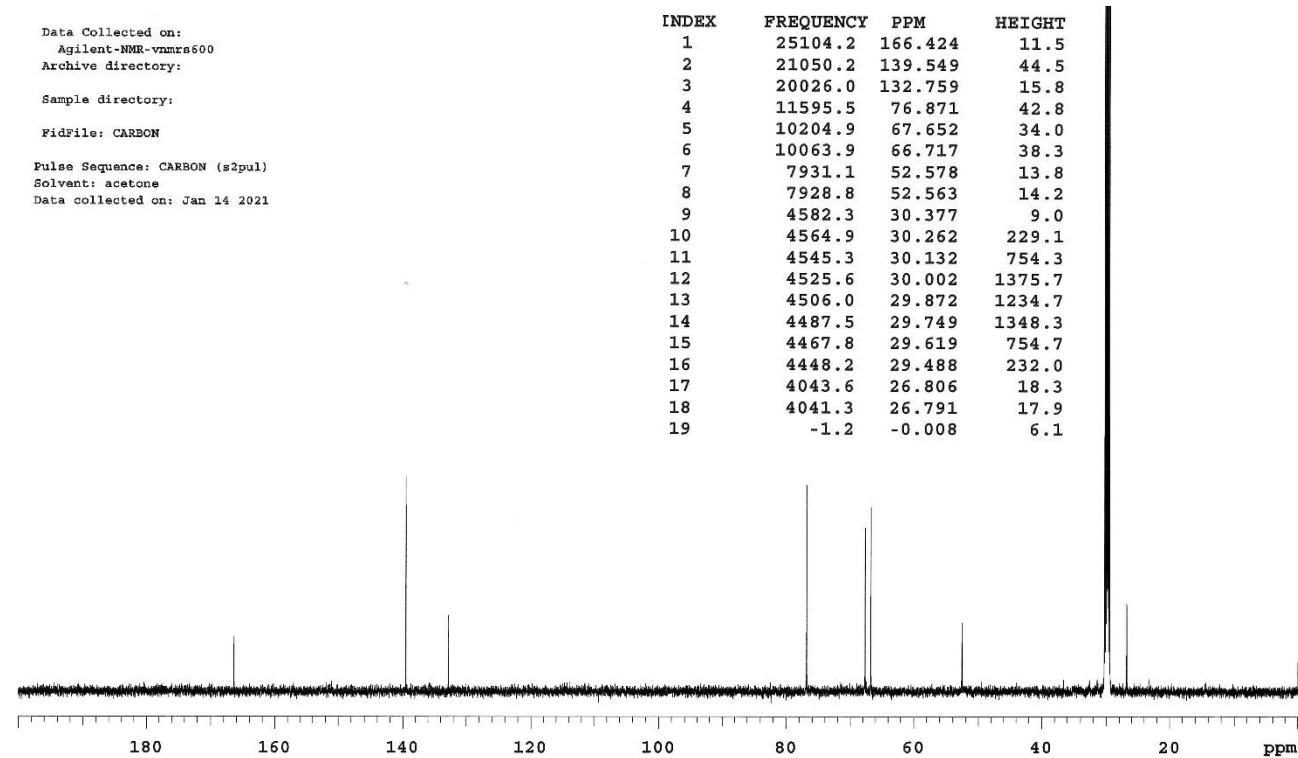

Figure S24. <sup>1</sup>H-NMR spectrum of (+)-1<sub>I</sub> in acetone-d<sub>6</sub> (600 MHz)

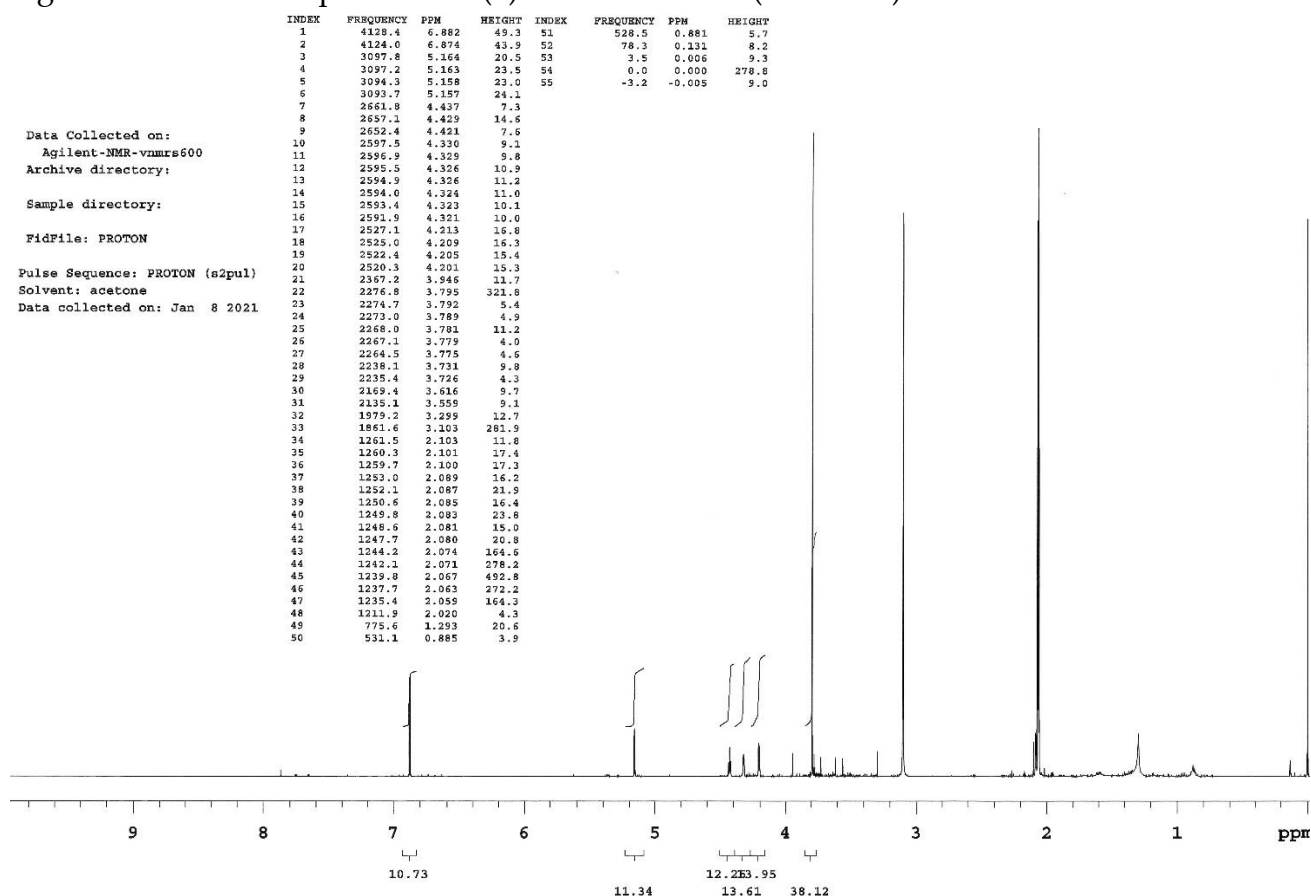

Figure S25. <sup>13</sup>C-NMR spectrum of (+)-1<sub>I</sub> in acetone-d<sub>6</sub> (150 MHz)

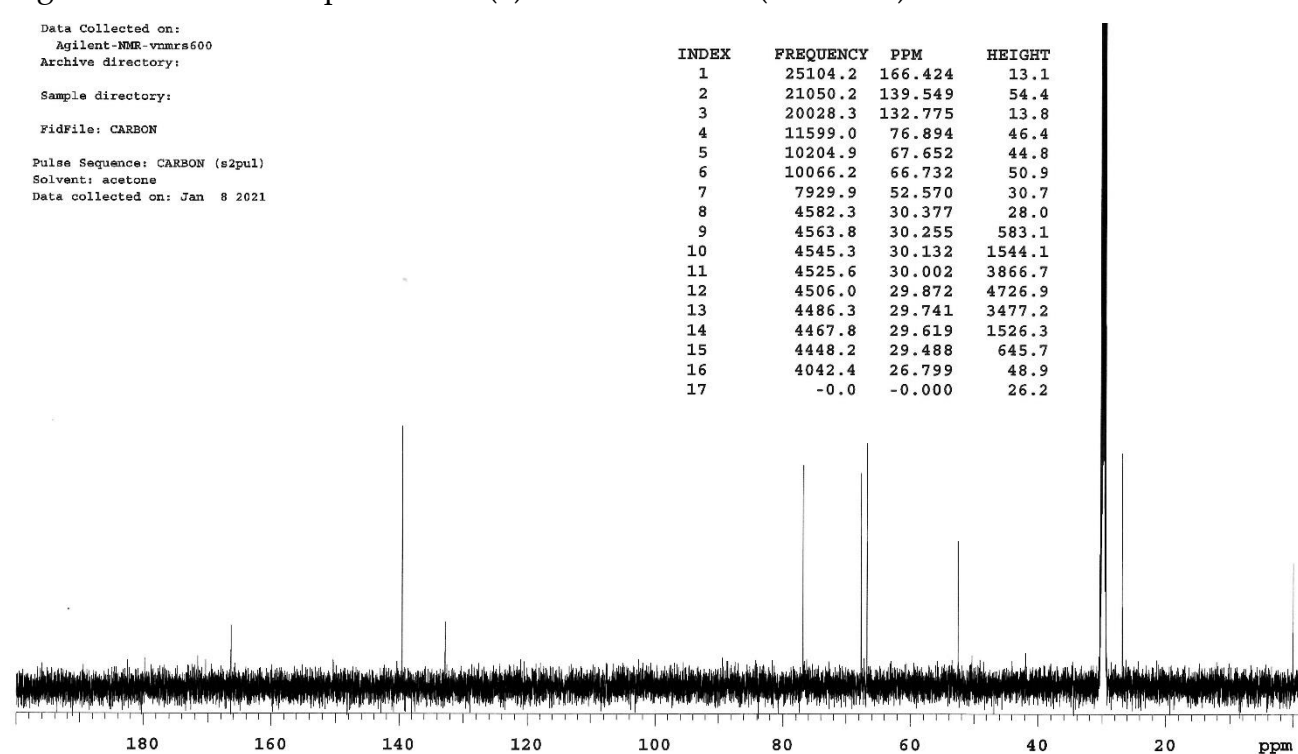

Figure S26. <sup>1</sup>H-NMR spectrum of (-)-11 in methanol-d<sub>4</sub> (600 MHz)

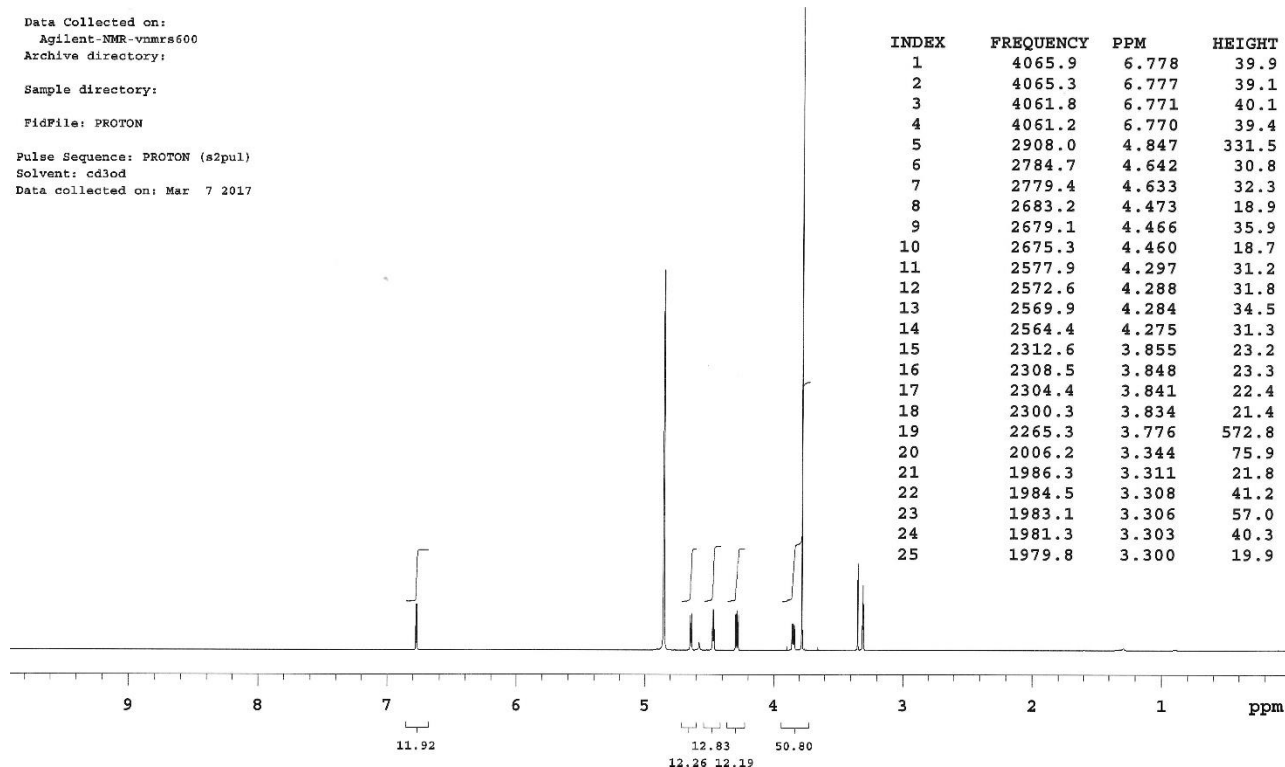

Figure S27. <sup>13</sup>C-NMR spectrum of (-)-11 in methanol-d<sub>4</sub> (150 MHz)

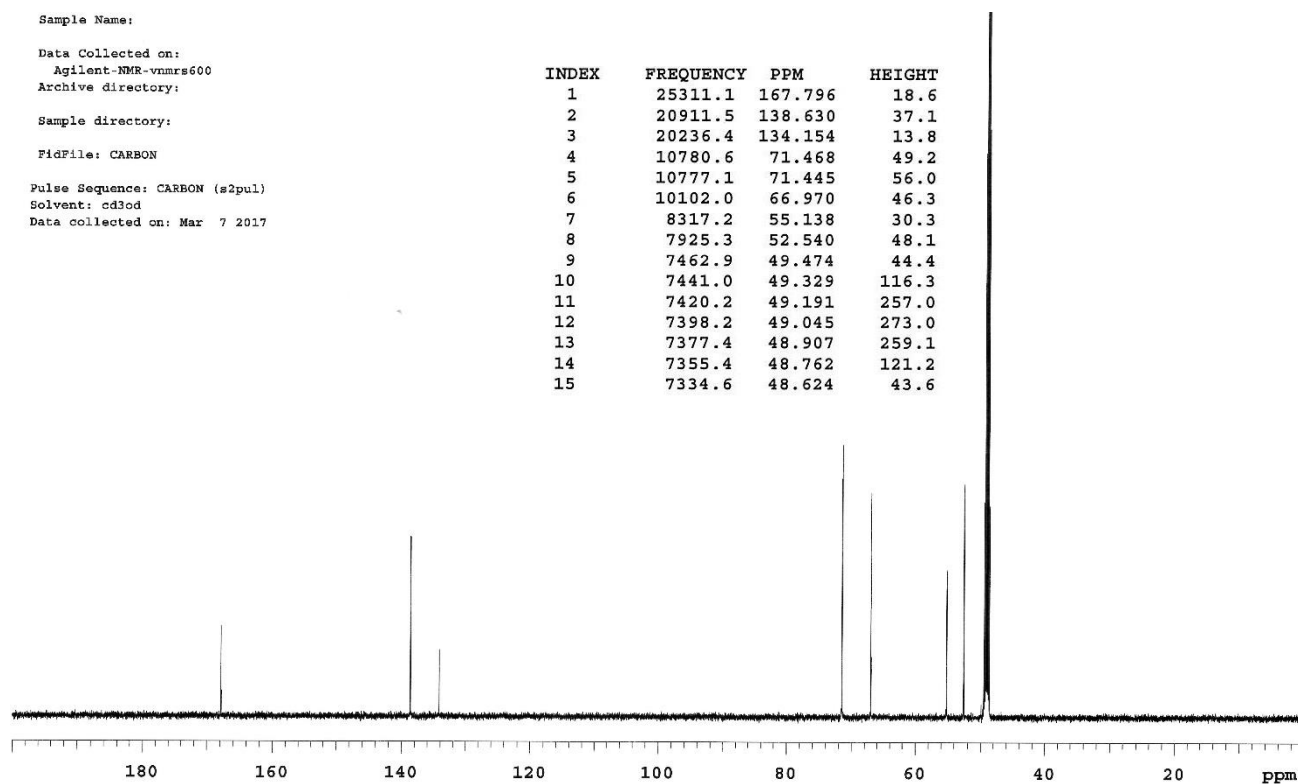

Figure S28. <sup>1</sup>H-NMR spectrum of (-)-12 in methanol-d<sub>4</sub> (600 MHz)

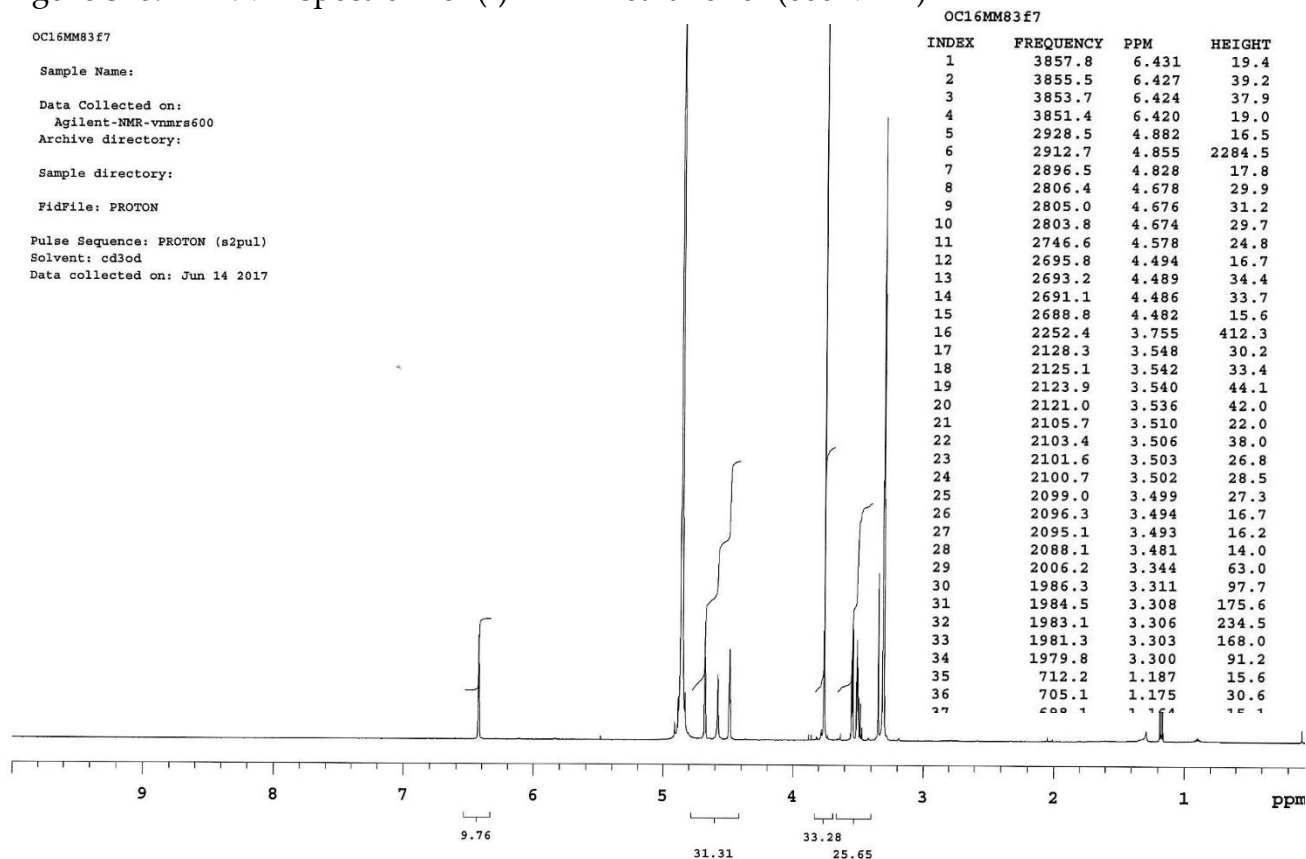

Figure S29. <sup>13</sup>C-NMR spectrum of (-)-12 in methanol-d<sub>4</sub> (150 MHz)

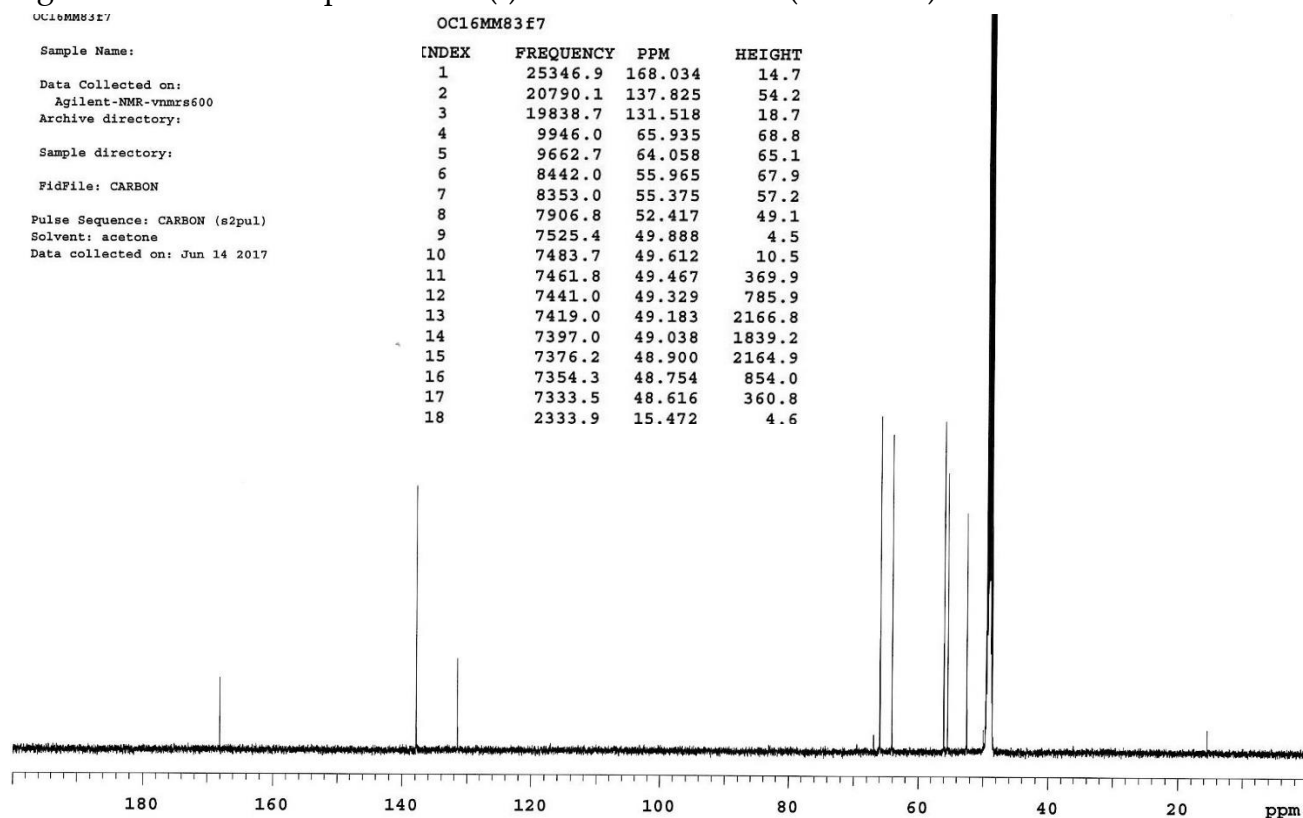

Figure S30. HMBC-NMR spectrum of (-)-**12** in methanol- $d_4$  (600 MHz)

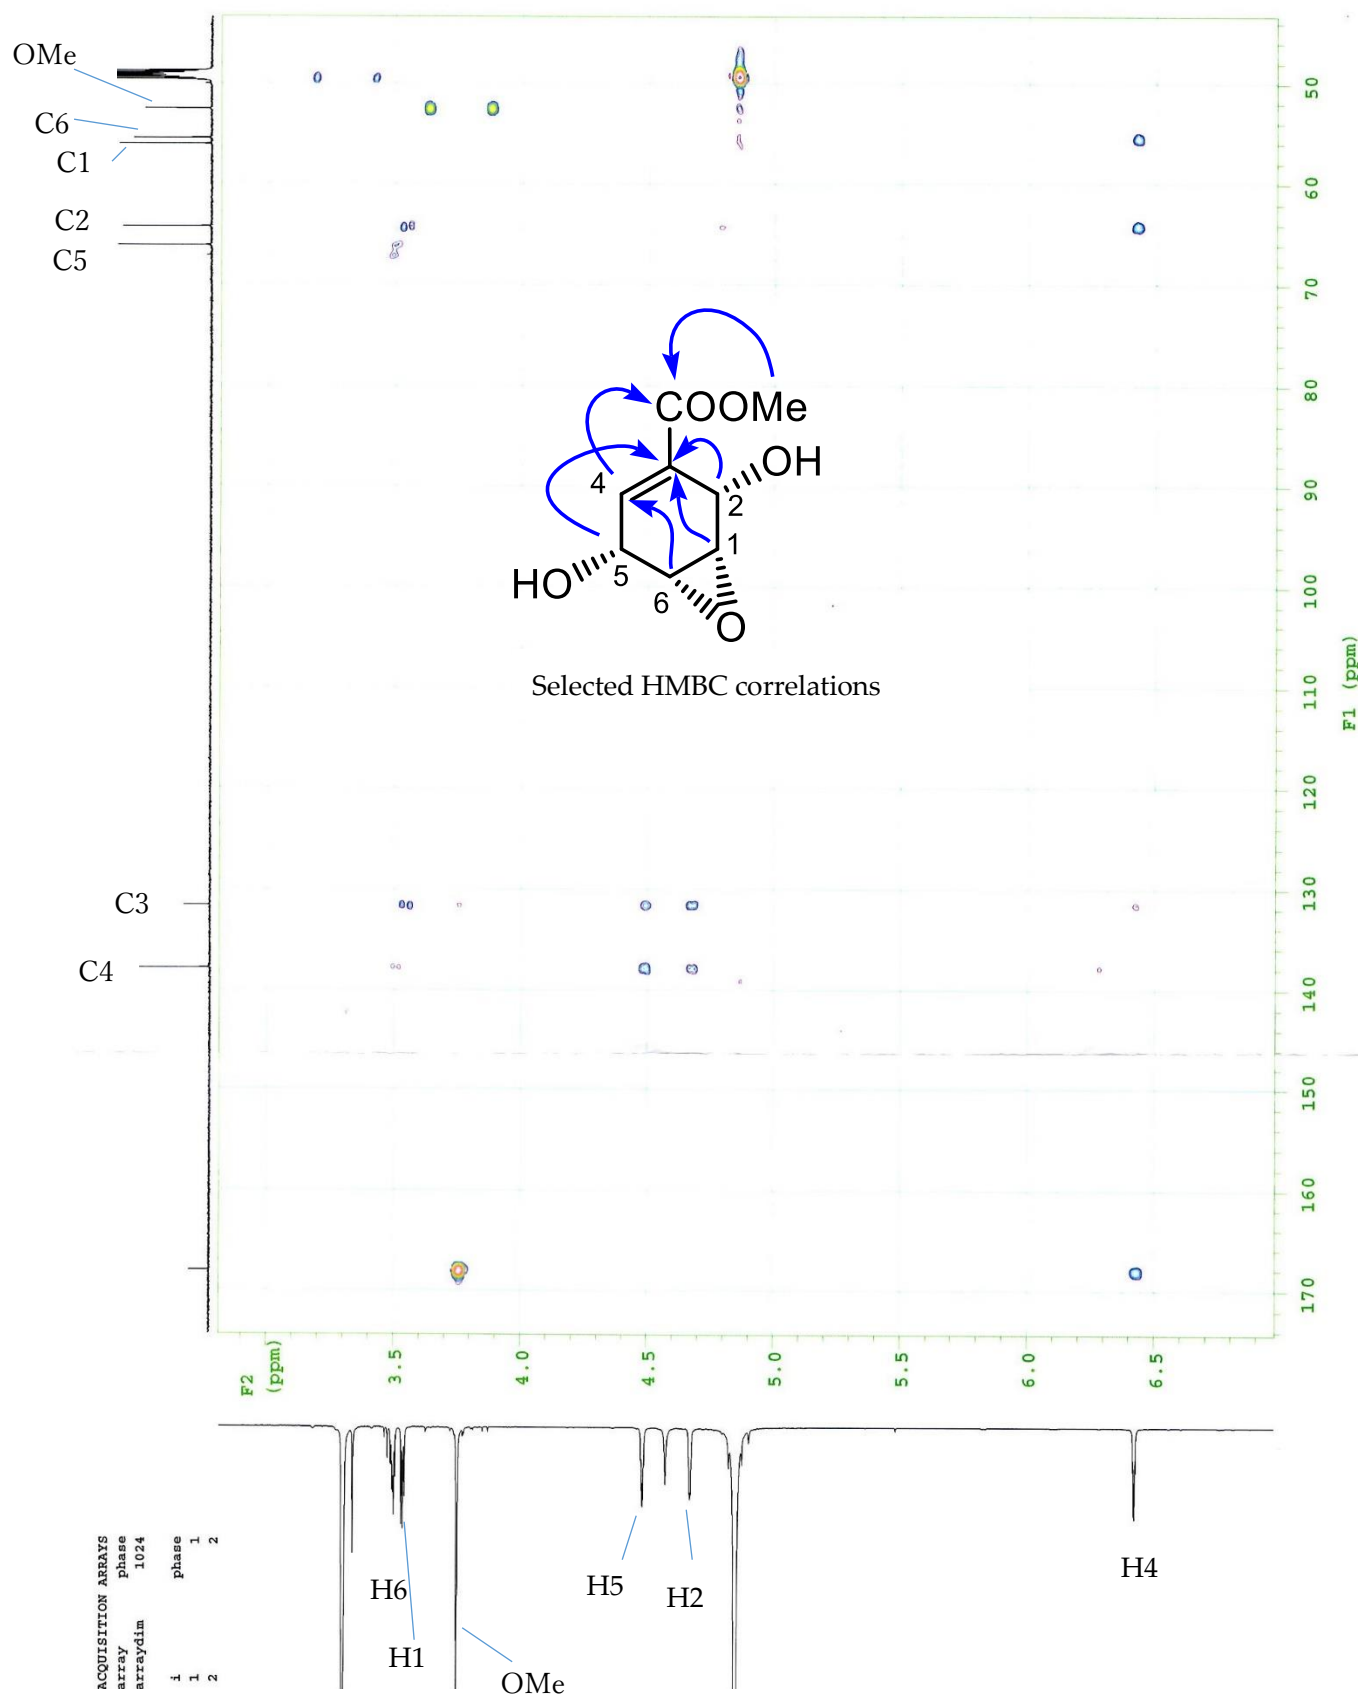



Figure S31. <sup>1</sup>H-NMR spectrum of (-)-7 in methanol-d<sub>4</sub> (600 MHz)

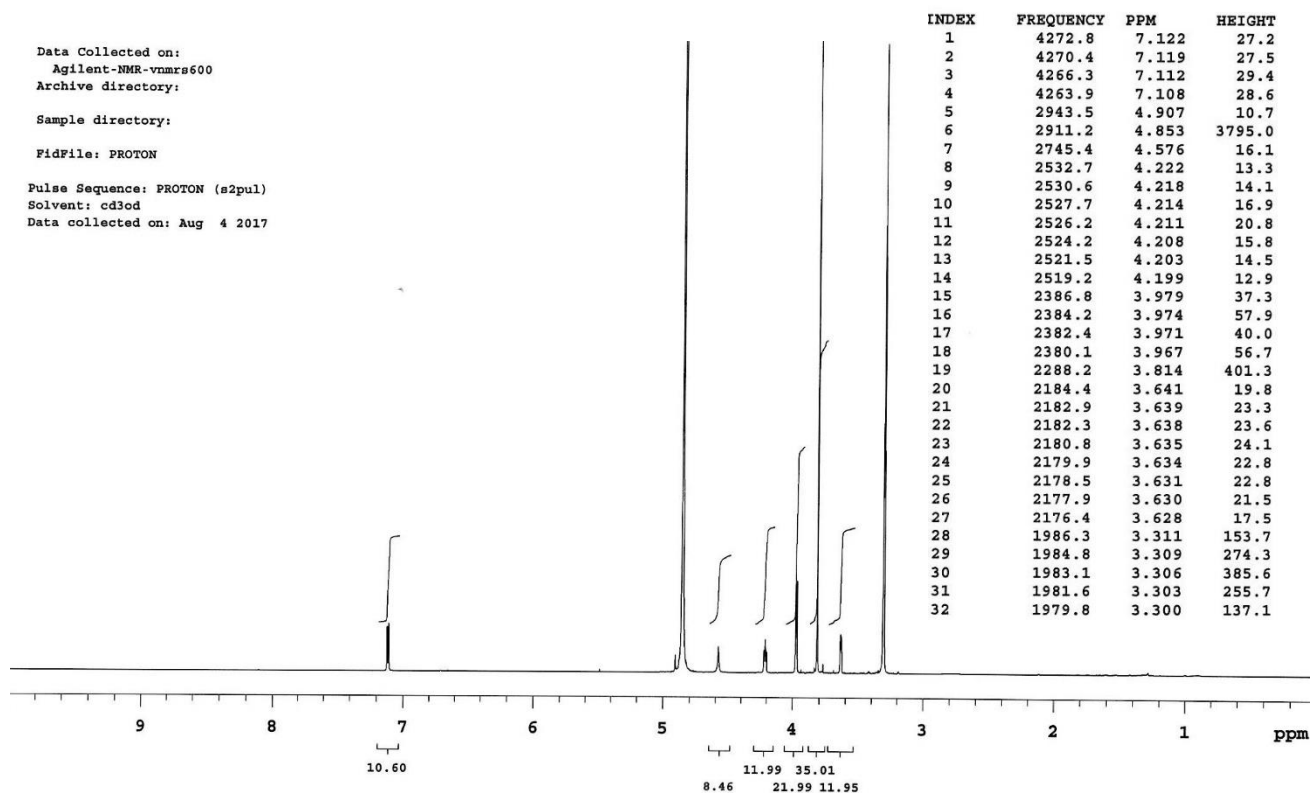

Figure S32. <sup>13</sup>C-NMR spectrum of (-)-7 in methanol-d<sub>4</sub> (150 MHz)

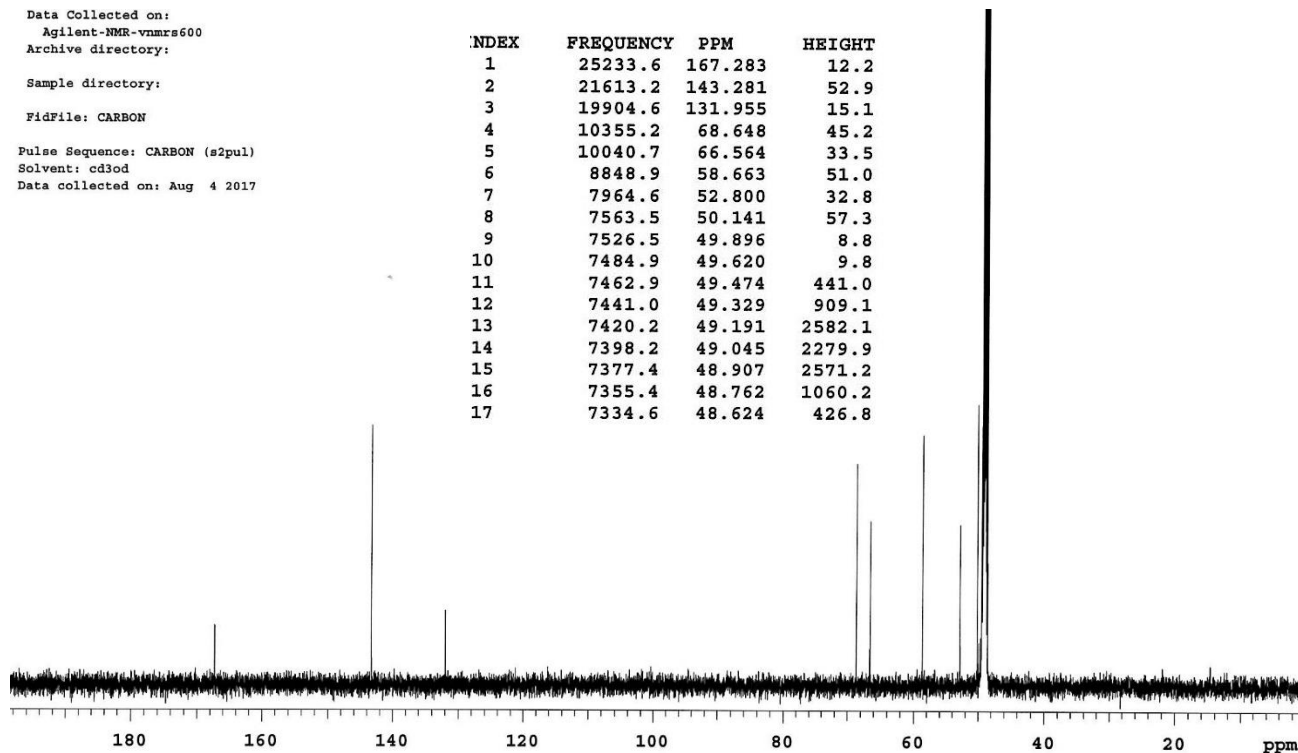

Figure S33. <sup>1</sup>H-NMR spectrum of (+)-7 in methanol-d<sub>4</sub> (600 MHz)

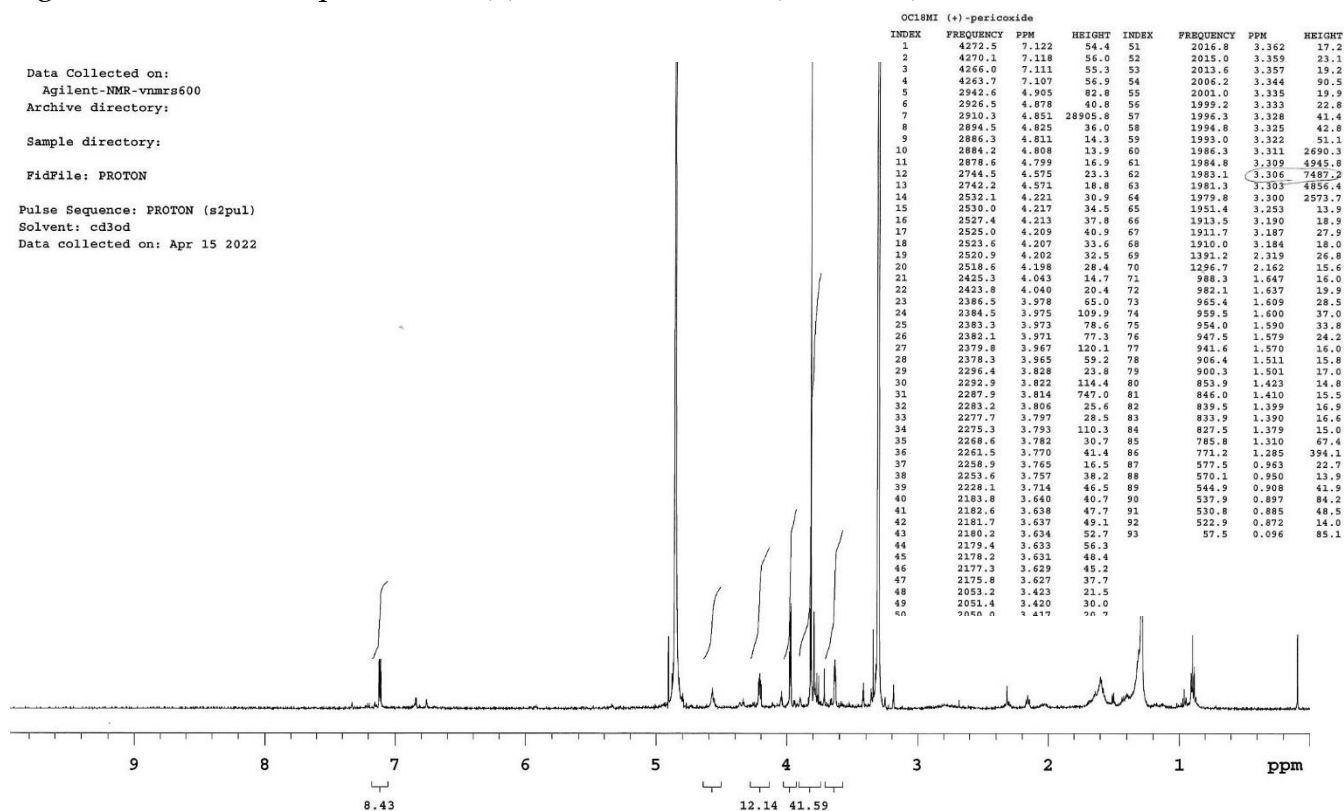

Figure S34. <sup>13</sup>C-NMR spectrum of (+)-7 in methanol-d<sub>4</sub> (150 MHz)

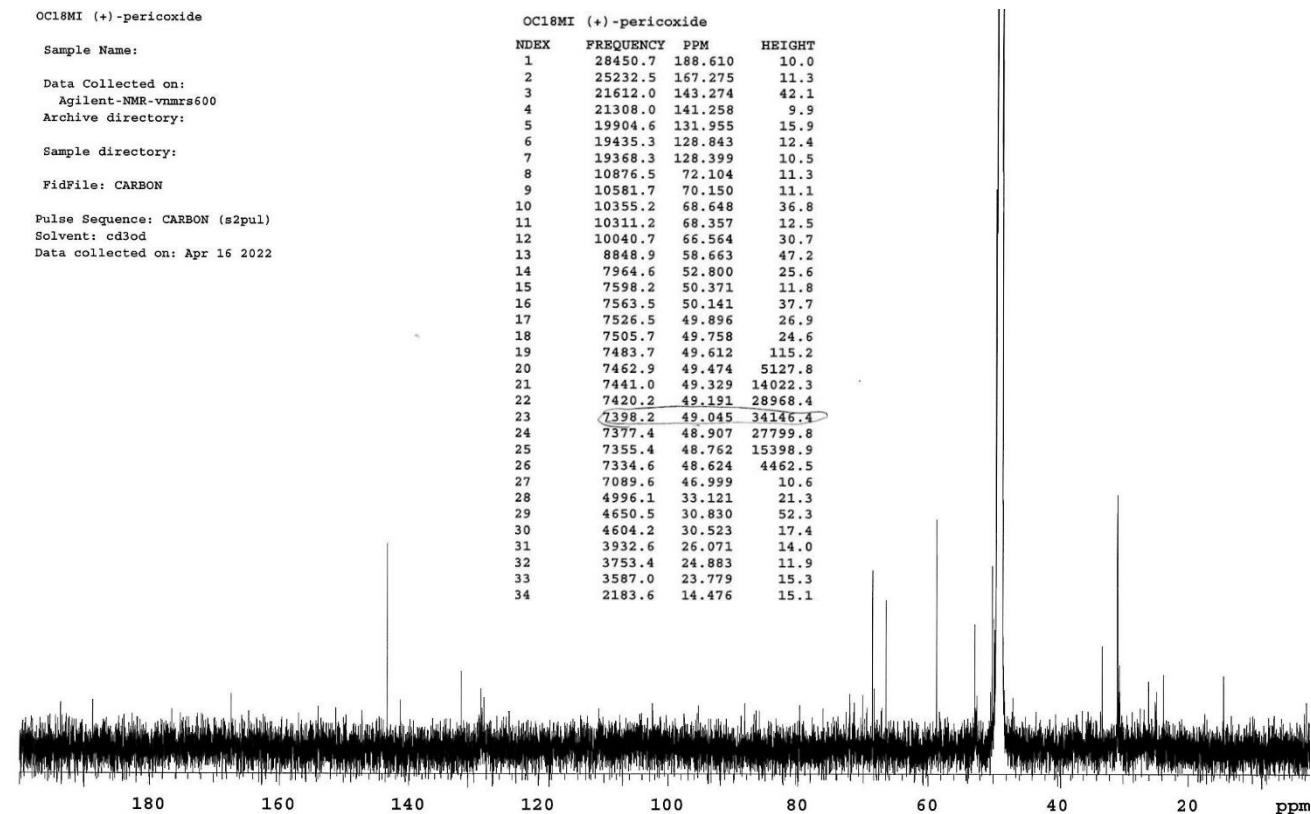

2. Table S1. Deprotection of (-)-**10**<sub>Br</sub> with Dowex® 50WX8-H

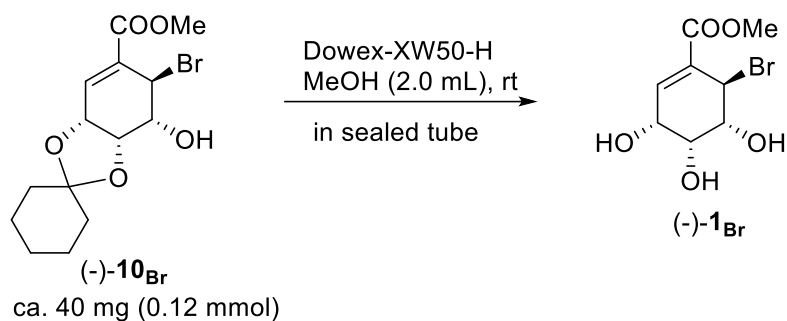

| entry | Dowex XW-H | temperature | time (h) | <b>1</b> <sub>Br</sub> , yield (%) |
|-------|------------|-------------|----------|------------------------------------|
| 1     | 108 mg     | 80 °C (MW)* | 1        | 32                                 |
| 2     | 102 mg     | 0 °C        | 86       | 47                                 |
| 3     | 108 mg     | rt          | 20       | 55                                 |
| 4     | 101 mg     | rt          | 40       | 73                                 |
| 5     | 103 mg     | rt          | 56       | 87                                 |
| 6     | 51.0 mg    | rt          | 64       | 63                                 |

General procedure: entry 4 (same as described in text, experimental section); To a solution of (-)-**10**<sub>Br</sub> (41.3 mg, 0.12 mmol) in MeOH (2.0 mL) was added Dowex® 50WX8-H (102.5 mg). The reaction mixture was stirred for 56 h at room temperature. The reaction mixture was filtered. The filtrate, which was condensed under reduced pressure to give a crude residue which was purified with silica gel column chromatography (eluent; CH<sub>2</sub>Cl<sub>2</sub>: MeOH = 95: 5) to afford (-)-**1**<sub>Br</sub> (27.6 mg, 87%) with recovery of the starting (-)-**10**<sub>Br</sub> (5.5 mg, 13%).

\*Results suggested that reduced amount of resin decreased chemical yield of desired **1**<sub>Br</sub> (entry 6) and optimum reaction time was 56 h (entries 3-5).
